# Supplementary material for: Synthesis and N–C bond cleavage reactions for cyclic phosphazenium dications
Source: Royal Society of Chemistry journal article supplement (doi:10.1039/d4dt02990a), 2024-11-13

## Supplementary Materials for

### Synthesis and N-C Bond Cleavage Reactions for Cyclic Phosphazanium Dications

Linkun Miao, Amir Yeganeh-Salman, Jason Yeung, and Douglas W. Stephan\*

Correspondence to: dstephan@chem.utoronto.ca

### Contents

|                                                                                    |    |
|------------------------------------------------------------------------------------|----|
| NMR spectra for $(C_6H_4)(PPh_2F_2)_2$ (1).....                                    | 3  |
| Figure S1. $^1H$ NMR (500 MHz, $CDCl_3$ , 298 K) spectrum of 1.....                | 3  |
| Figure S2. $^{13}C\{^1H\}$ NMR (126 MHz, $CDCl_3$ , 298 K) spectrum of 1.....      | 4  |
| Figure S3. $^{31}P\{^1H\}$ NMR (162 MHz, $CDCl_3$ , 298K) spectrum of 1.....       | 5  |
| Figure S4. $^{19}F$ NMR (376 MHz, $CDCl_3$ , 298 K) spectrum of 1.....             | 6  |
| NMR spectra for $[(C_6H_4)(PPh_2F)_2][B(C_6F_5)_4]_2$ (2).....                     | 7  |
| Figure S5. $^1H$ NMR (500 MHz, $CD_2Cl_2$ , 298 K) spectrum of 2.....              | 7  |
| Figure S6. $^{13}C\{^1H\}$ NMR (126 MHz, $CD_2Cl_2$ , 298 K) spectrum of 2.....    | 8  |
| Figure S7. $^{31}P\{^1H\}$ NMR (162 MHz, $CD_2Cl_2$ , 298K) spectrum of 2.....     | 9  |
| Figure S8. $^{19}F$ NMR (376 MHz, $CD_2Cl_2$ , 298 K) spectrum of 2.....           | 10 |
| Figure S9. $^{11}B$ NMR (128 MHz, $CD_2Cl_2$ , 298 K) spectrum of compound 2.....  | 11 |
| NMR spectra for $[(C_6H_4)(PPh_2Cl)_2][Cl]_2$ (3).....                             | 12 |
| Figure S10. $^1H$ NMR (500 MHz, $CD_2Cl_2$ , 298 K) spectrum of 3.....             | 12 |
| Figure S11. $^{13}C\{^1H\}$ NMR (126 MHz, $CD_2Cl_2$ , 298 K) spectrum of 3.....   | 13 |
| Figure S12. $^{31}P\{^1H\}$ NMR (162 MHz, $CD_2Cl_2$ , 298K) spectrum of 3.....    | 14 |
| NMR spectra for $[(C_6H_4)(PPh_2Cl)_2]_2[BF_{4-n}Cl_n]$ (3').....                  | 15 |
| Figure S13. $^{31}P\{^1H\}$ NMR (162 MHz, $CH_2Cl_2$ , 298K) spectrum of 3'.....   | 15 |
| Figure S14. $^{19}F$ NMR (376 MHz, $CH_2Cl_2$ , 298 K) spectrum of 3'.....         | 16 |
| NMR spectra for $[(C_6H_4)(PPh_2)_2(\mu-NMe)][B(C_6F_5)_4]_2$ (4).....             | 17 |
| Figure S15. $^1H$ NMR (500 MHz, $CD_2Cl_2$ , 298 K) spectrum of 4.....             | 17 |
| Figure S16. $^{13}C\{^1H\}$ NMR (126 MHz, $CD_2Cl_2$ , 298 K) spectrum of 4.....   | 18 |
| Figure S17. $^{31}P\{^1H\}$ NMR (162 MHz, $CD_2Cl_2$ , 298K) spectrum of 4.....    | 19 |
| Figure S18. $^{19}F$ NMR (376 MHz, $CD_2Cl_2$ , 298 K) spectrum of 4.....          | 20 |
| Figure S19. $^{11}B$ NMR (128 MHz, $CD_2Cl_2$ , 298 K) spectrum of compound 4..... | 21 |
| NMR spectra for $[(C_6H_4)(PPh_2NMe_2)_2][Cl]_2$ (5).....                          | 22 |
| Figure S20. $^1H$ NMR (500 MHz, $CD_2Cl_2$ , 298 K) spectrum of 5.....             | 22 |
| Figure S21. $^{13}C\{^1H\}$ NMR (126 MHz, $CD_2Cl_2$ , 298 K) spectrum of 5.....   | 23 |
| Figure S22. $^{31}P\{^1H\}$ NMR (162 MHz, $CD_2Cl_2$ , 298K) spectrum of 5.....    | 24 |
| NMR spectra for $[(C_6H_4)(PPh_2)_2(\mu-N)[Cl]]$ (6).....                          | 25 |
| Figure S23. $^1H$ NMR (500 MHz, $CD_2Cl_2$ , 298 K) spectrum of 6.....             | 25 |
| Figure S24. $^{13}C\{^1H\}$ NMR (126 MHz, $CD_2Cl_2$ , 298 K) spectrum of 6.....   | 26 |
| Figure S25. $^{31}P\{^1H\}$ NMR (162 MHz, $CD_2Cl_2$ , 298K) spectrum of 6.....    | 27 |

|                                                                                                                                                                                        |    |
|----------------------------------------------------------------------------------------------------------------------------------------------------------------------------------------|----|
| NMR spectra for the reaction of Compound 3 with (Me <sub>3</sub> Si) <sub>2</sub> NMe .....                                                                                            | 28 |
| Figure S26. A) <sup>1</sup> H NMR spectrum in CH <sub>2</sub> Cl <sub>2</sub> of crude reaction mixture (A) and reaction mixture after exposure to high vacuum (B).....                | 28 |
| Figure S27. <sup>31</sup> P{ <sup>1</sup> H} NMR spectrum in CH <sub>2</sub> Cl <sub>2</sub> of 3 (A) and reaction mixture indicating formation of 6 (B). .....                        | 29 |
| NMR spectra for the reaction of Compound 4 with [nBu <sub>4</sub> N][Cl] .....                                                                                                         | 30 |
| Figure S28. A) <sup>1</sup> H NMR spectrum in CH <sub>2</sub> Cl <sub>2</sub> of crude reaction mixture (A) and reaction mixture after exposure to high vacuum (B).....                | 30 |
| Figure S29. <sup>31</sup> P{ <sup>1</sup> H} NMR spectrum in CH <sub>2</sub> Cl <sub>2</sub> of 4 (A) and reaction mixture indicating formation of 6' (B).....                         | 31 |
| NMR spectra for [(CH <sub>2</sub> PPh <sub>2</sub> ) <sub>2</sub> NMe][B(C <sub>6</sub> F <sub>5</sub> ) <sub>4</sub> ] <sub>2</sub> (8).....                                          | 32 |
| Figure S30. <sup>1</sup> H NMR (500 MHz, CD <sub>2</sub> Cl <sub>2</sub> , 298 K) spectrum of 8.....                                                                                   | 32 |
| Figure S31. <sup>13</sup> C{ <sup>1</sup> H} NMR (126 MHz, CD <sub>2</sub> Cl <sub>2</sub> , 298 K) spectrum of 8.....                                                                 | 33 |
| Figure S32. <sup>31</sup> P{ <sup>1</sup> H} NMR (162 MHz, CD <sub>2</sub> Cl <sub>2</sub> , 298K) spectrum of 8.....                                                                  | 34 |
| Figure S33. <sup>19</sup> F NMR (376 MHz, CD <sub>2</sub> Cl <sub>2</sub> , 298 K) spectrum of 8.....                                                                                  | 35 |
| Figure S34. <sup>11</sup> B NMR (128 MHz, CD <sub>2</sub> Cl <sub>2</sub> , 298 K) spectrum of compound 8.....                                                                         | 36 |
| NMR spectra for [(CH <sub>2</sub> PPh <sub>2</sub> ) <sub>2</sub> NCH <sub>2</sub> CHCH <sub>2</sub> ][B(C <sub>6</sub> F <sub>5</sub> ) <sub>4</sub> ] <sub>2</sub> (9) .....         | 37 |
| Figure S35. <sup>1</sup> H NMR (500 MHz, CD <sub>2</sub> Cl <sub>2</sub> , 298 K) spectrum of 9.....                                                                                   | 37 |
| Figure S36. <sup>13</sup> C{ <sup>1</sup> H} NMR (126 MHz, CD <sub>2</sub> Cl <sub>2</sub> , 298 K) spectrum of 9.....                                                                 | 38 |
| Figure S37. <sup>31</sup> P{ <sup>1</sup> H} NMR (162 MHz, CD <sub>2</sub> Cl <sub>2</sub> , 298K) spectrum of 9.....                                                                  | 39 |
| Figure S38. <sup>19</sup> F NMR (376 MHz, CD <sub>2</sub> Cl <sub>2</sub> , 298 K) spectrum of 9.....                                                                                  | 40 |
| Figure S39. <sup>11</sup> B NMR (128 MHz, CD <sub>2</sub> Cl <sub>2</sub> , 298 K) spectrum of compound 9.....                                                                         | 41 |
| NMR spectra for [(CH <sub>2</sub> PPh <sub>2</sub> ) <sub>2</sub> NCH <sub>2</sub> Ph][B(C <sub>6</sub> F <sub>5</sub> ) <sub>4</sub> ] <sub>2</sub> (10).....                         | 42 |
| Figure S40. <sup>1</sup> H NMR (500 MHz, CD <sub>2</sub> Cl <sub>2</sub> , 298 K) spectrum of 10.....                                                                                  | 42 |
| Figure S41. <sup>13</sup> C{ <sup>1</sup> H} NMR (126 MHz, CD <sub>2</sub> Cl <sub>2</sub> , 298 K) spectrum of 10.....                                                                | 43 |
| Figure S42. <sup>31</sup> P{ <sup>1</sup> H} NMR (162 MHz, CD <sub>2</sub> Cl <sub>2</sub> , 298K) spectrum of 10.....                                                                 | 44 |
| Figure S43. <sup>19</sup> F NMR (376 MHz, CD <sub>2</sub> Cl <sub>2</sub> , 298 K) spectrum of 10.....                                                                                 | 45 |
| Figure S44. <sup>11</sup> B NMR (128 MHz, CD <sub>2</sub> Cl <sub>2</sub> , 298 K) spectrum of compound 10.....                                                                        | 46 |
| NMR spectra for the reaction of 8 with [nBu <sub>4</sub> N][Cl] .....                                                                                                                  | 47 |
| Figure S45. A) <sup>1</sup> H NMR spectrum in CH <sub>2</sub> Cl <sub>2</sub> of crude reaction mixture (A) and reaction mixture after exposure to high vacuum (B).....                | 47 |
| Figure S46. <sup>31</sup> P{ <sup>1</sup> H} NMR spectrum in CH <sub>2</sub> Cl <sub>2</sub> of 8 (A) and reaction mixture indicating formation of 11 (B). .....                       | 48 |
| NMR spectra for the reaction of 9 with [nBu <sub>4</sub> N][Cl] .....                                                                                                                  | 49 |
| Figure S47. A) <sup>1</sup> H NMR spectrum in CD <sub>2</sub> Cl <sub>2</sub> of crude reaction mixture (A) and reaction mixture spiked with C <sub>3</sub> H <sub>5</sub> Cl (B)..... | 49 |
| Figure S48. <sup>31</sup> P{ <sup>1</sup> H} NMR spectrum in CH <sub>2</sub> Cl <sub>2</sub> of 9 (A) and reaction mixture indicating formation of 11 (B). .....                       | 50 |
| NMR spectra for the reaction of 10 with [nBu <sub>4</sub> N][Cl] .....                                                                                                                 | 51 |
| Figure S49. A) <sup>1</sup> H NMR spectrum in CH <sub>2</sub> Cl <sub>2</sub> of of crude reaction mixture (A) and reaction mixture spiked with BnCl (B).....                          | 51 |
| Figure S50. <sup>31</sup> P{ <sup>1</sup> H} NMR spectrum in CH <sub>2</sub> Cl <sub>2</sub> of 10 (A) and reaction mixture indicating formation of 11 (B). .....                      | 52 |

# NMR spectra for (C<sub>6</sub>H<sub>4</sub>)(PPh<sub>2</sub>F<sub>2</sub>)<sub>2</sub> (1)

Figure S1. <sup>1</sup>H NMR (500 MHz, CDCl<sub>3</sub>, 298 K) spectrum of 1.

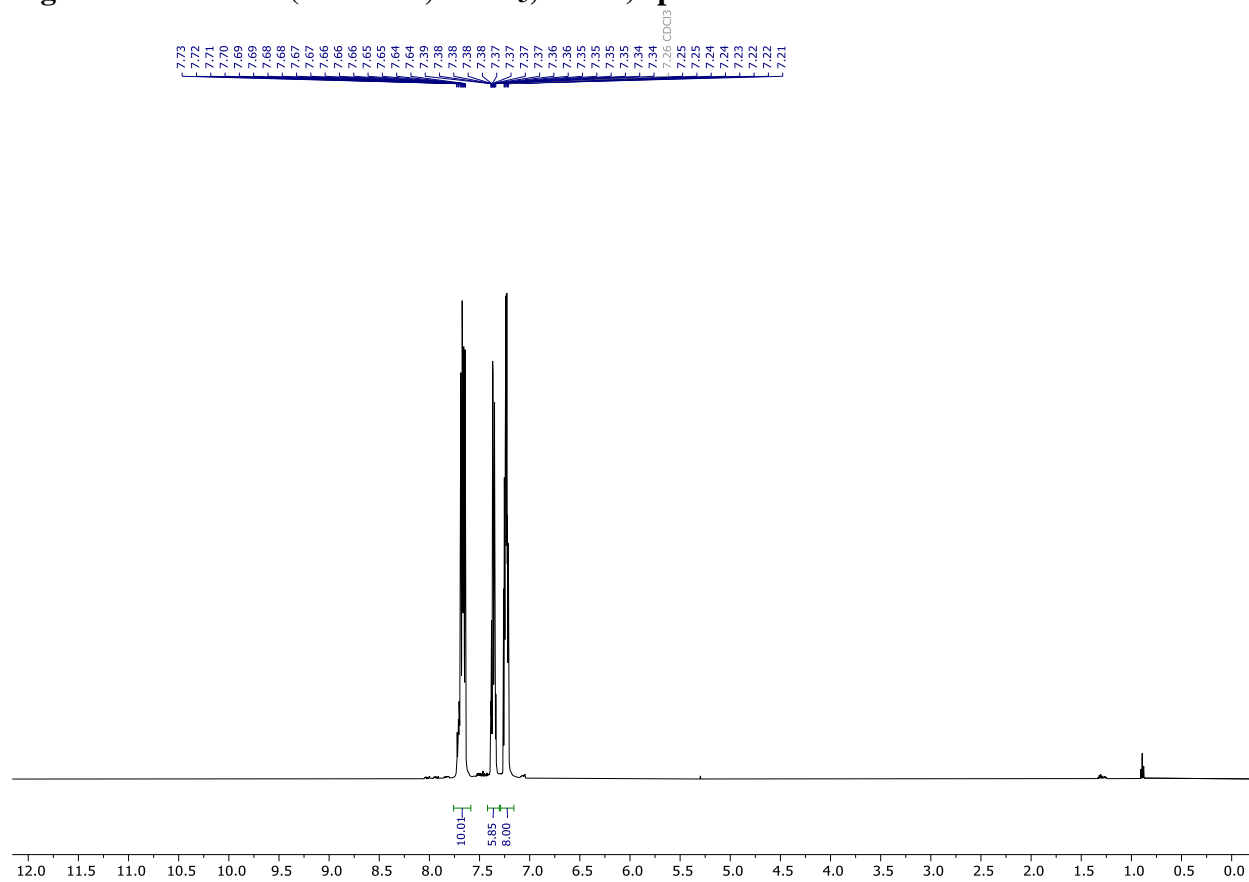

Figure S2.  $^{13}\text{C}\{^1\text{H}\}$  NMR (126 MHz,  $\text{CDCl}_3$ , 298 K) spectrum of **1**.

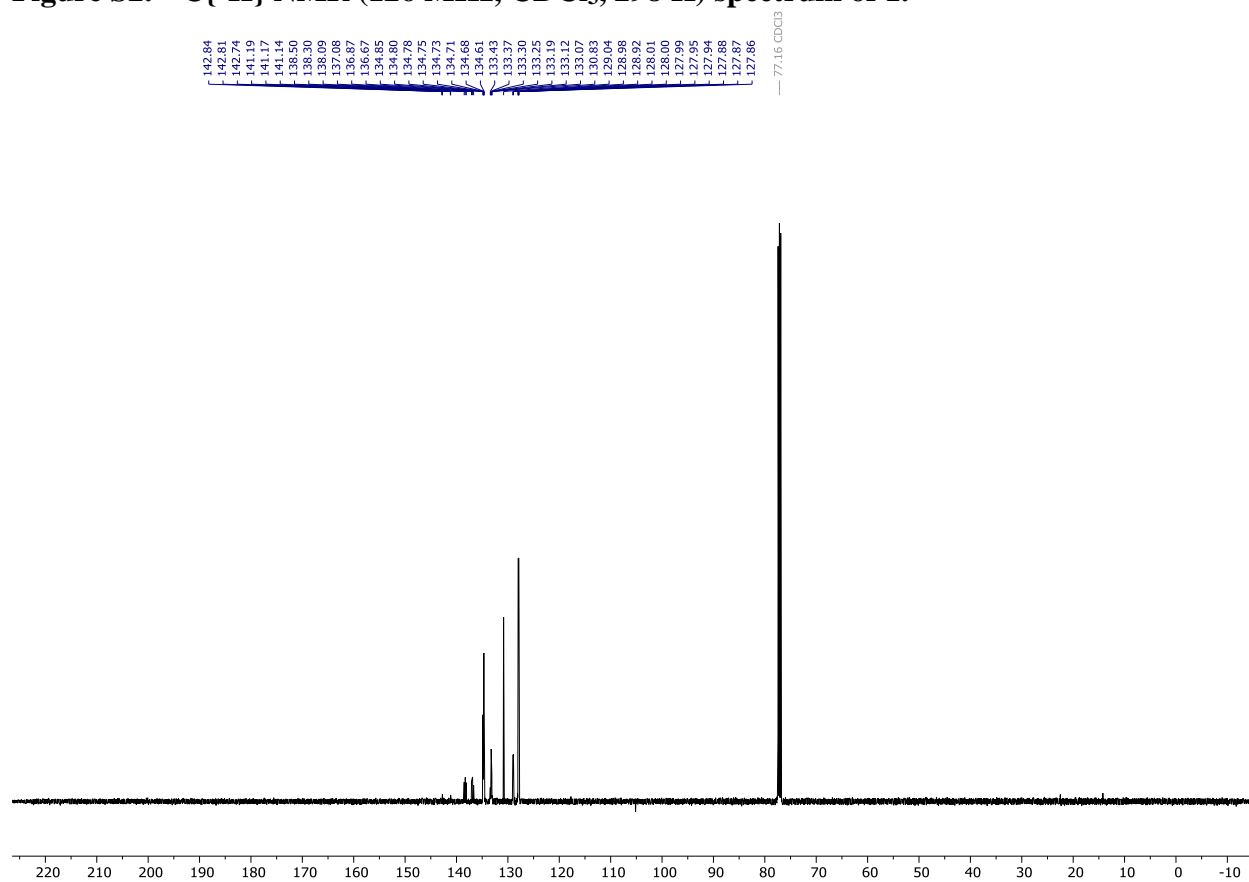

Figure S3.  $^{31}\text{P}\{^1\text{H}\}$  NMR (162 MHz,  $\text{CDCl}_3$ , 298K) spectrum of 1.

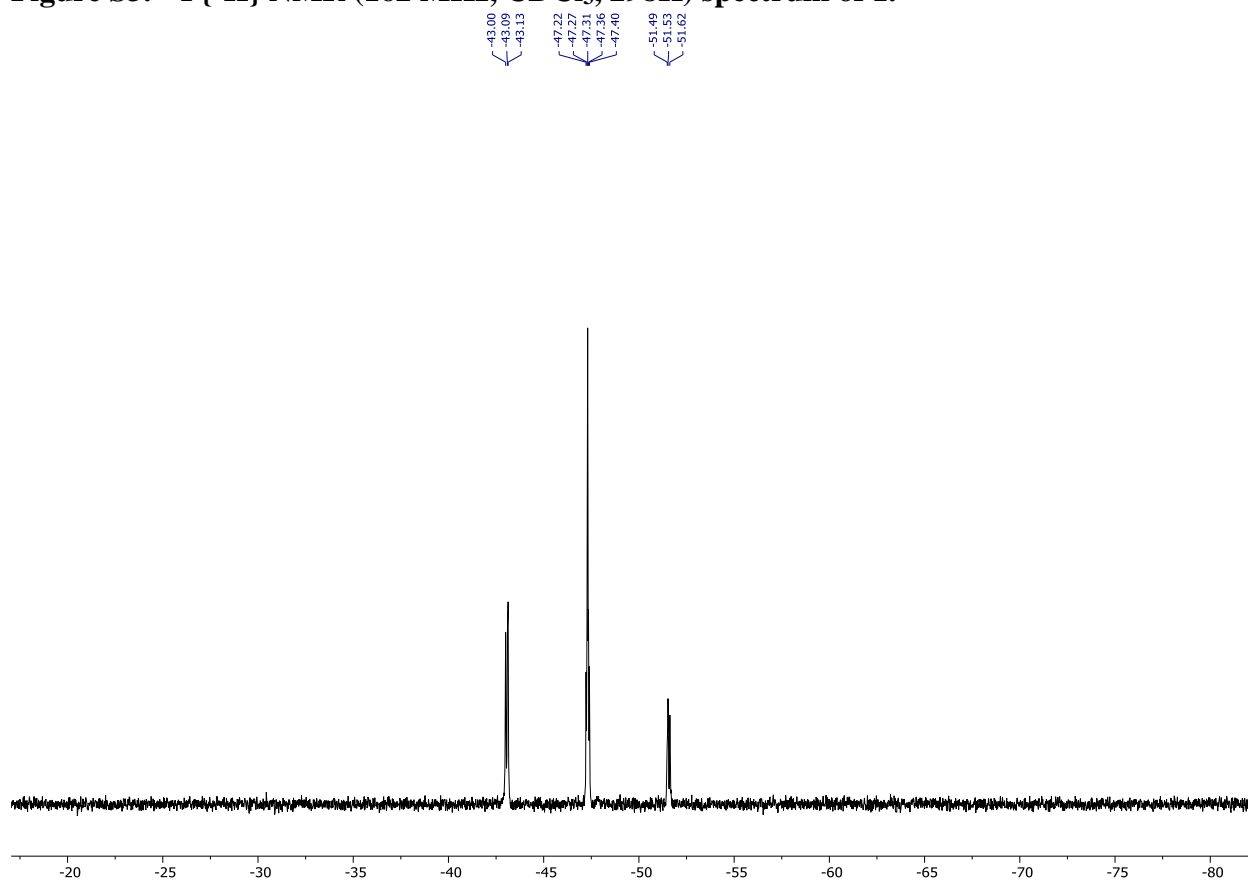

Figure S4.  $^{19}\text{F}$  NMR (376 MHz,  $\text{CDCl}_3$ , 298 K) spectrum of **1**.

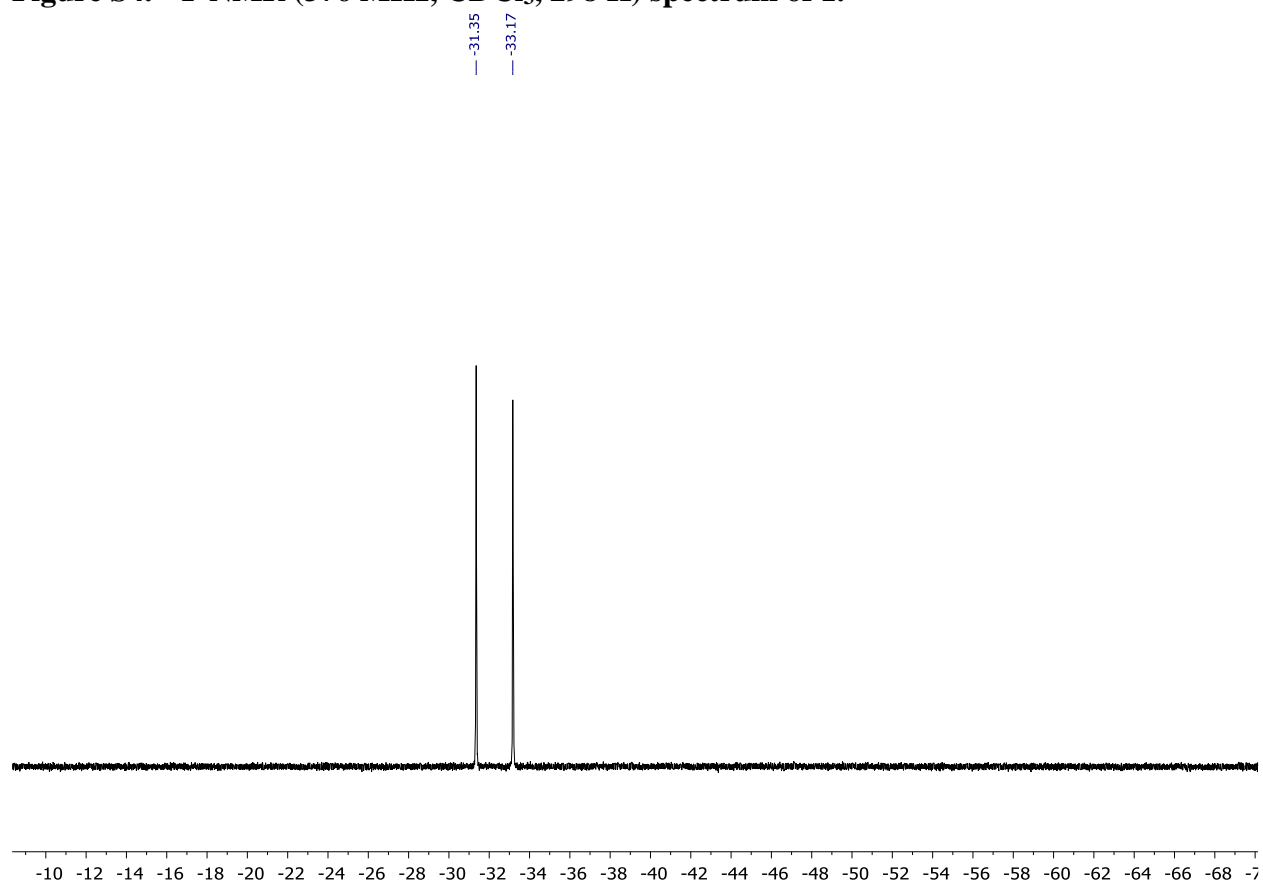

# NMR spectra for $[(C_6H_4)(PPh_2F)_2][B(C_6F_5)_4]_2$ (2)

Figure S5.  $^1H$  NMR (500 MHz,  $CD_2Cl_2$ , 298 K) spectrum of 2.

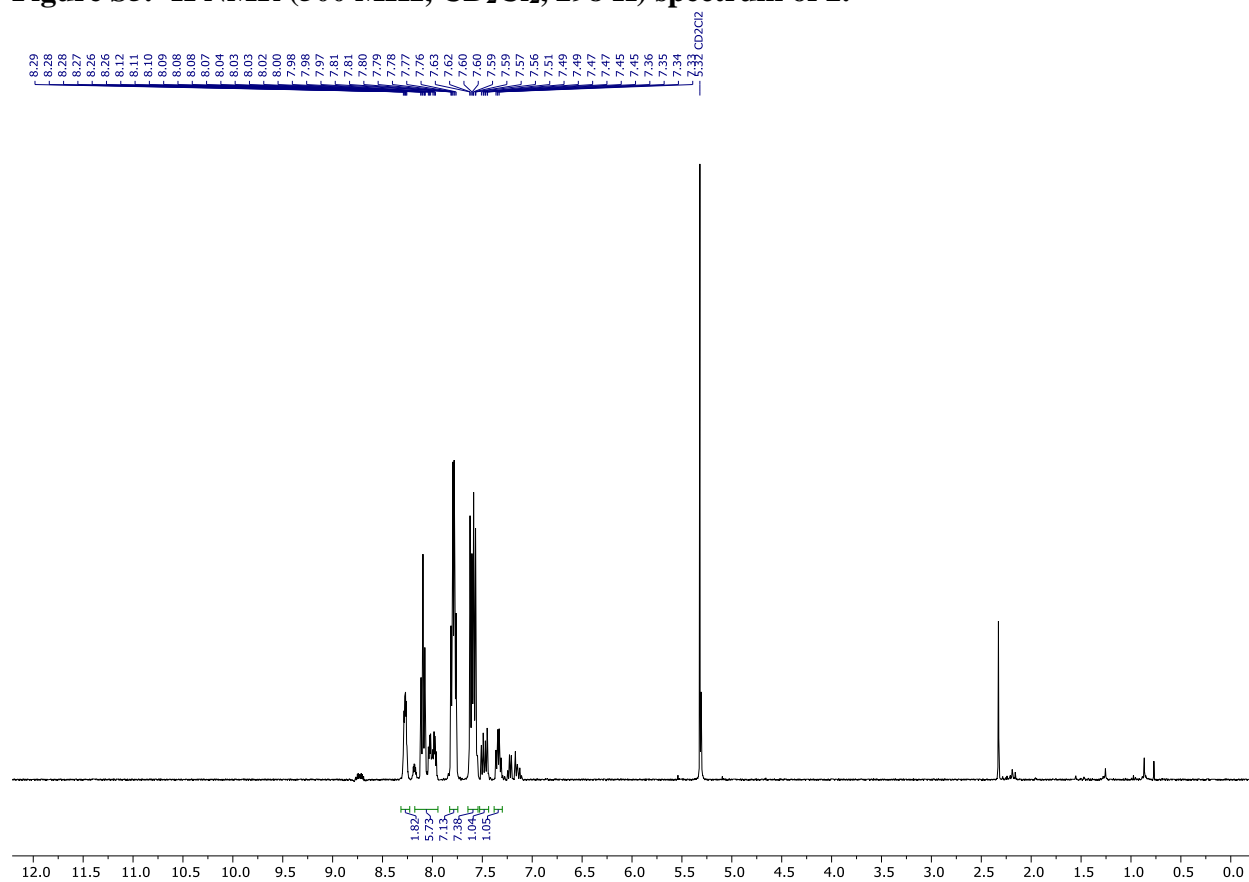

Figure S6.  $^{13}\text{C}\{^1\text{H}\}$  NMR (126 MHz,  $\text{CD}_2\text{Cl}_2$ , 298 K) spectrum of **2**.

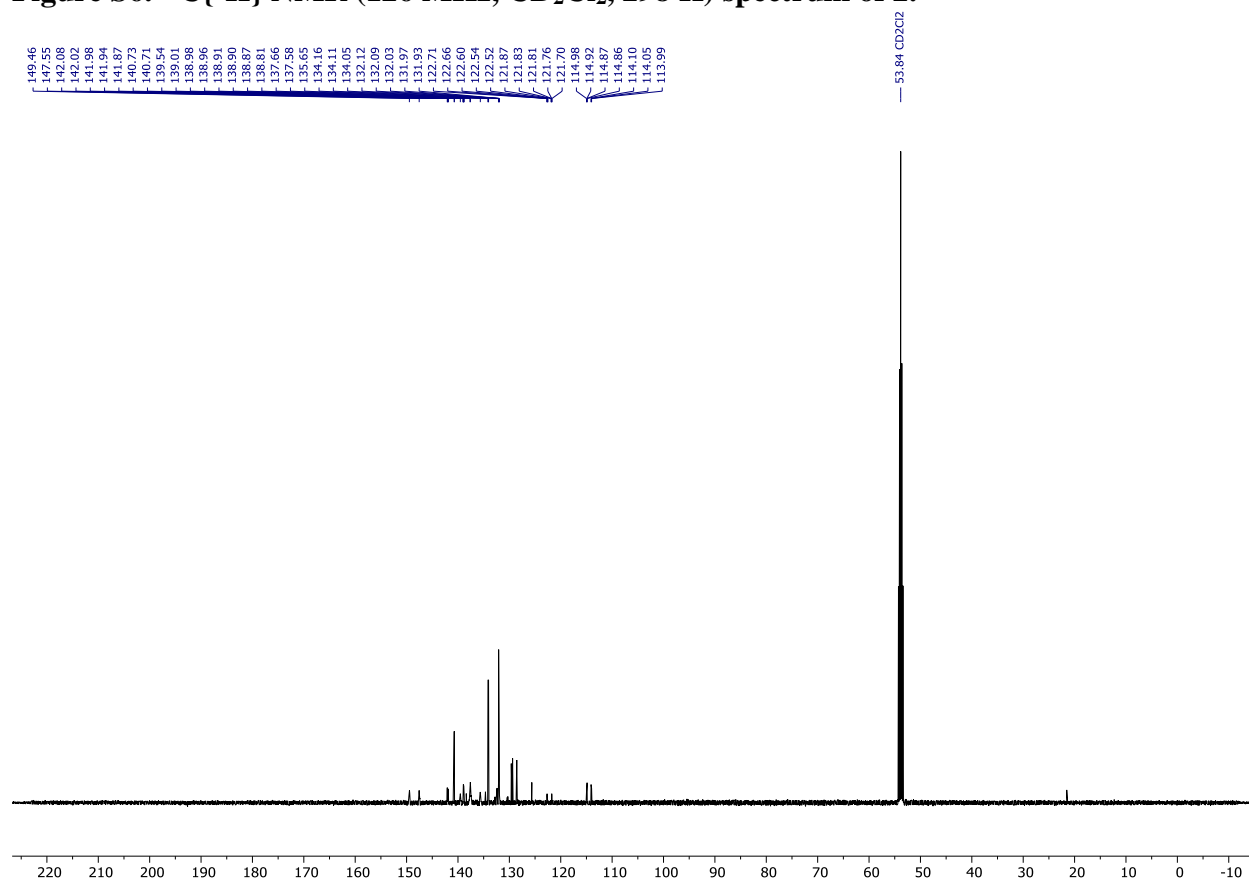



Figure S7.  $^{31}\text{P}\{^1\text{H}\}$  NMR (162 MHz,  $\text{CD}_2\text{Cl}_2$ , 298K) spectrum of 2.

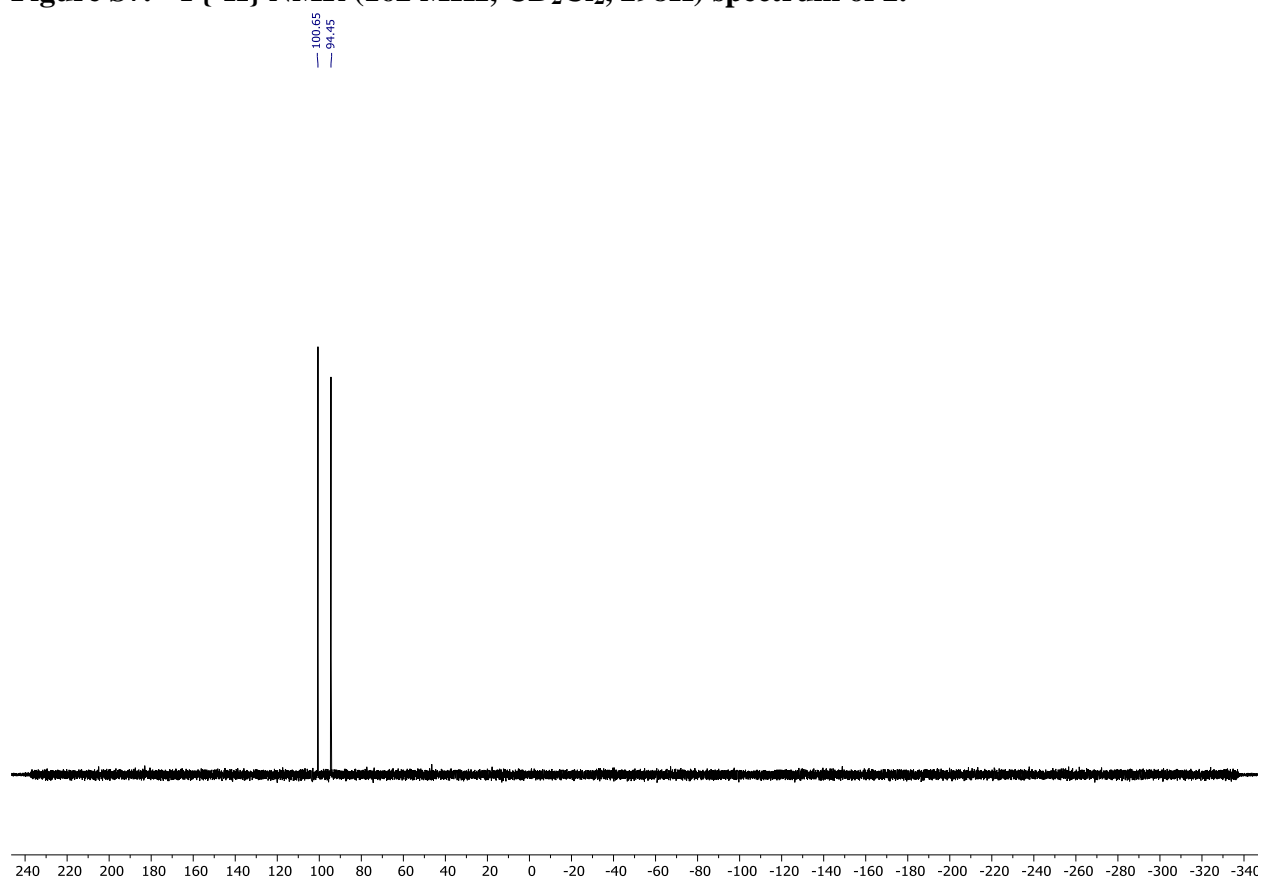

Figure S8.  $^{19}\text{F}$  NMR (376 MHz,  $\text{CD}_2\text{Cl}_2$ , 298 K) spectrum of **2**.

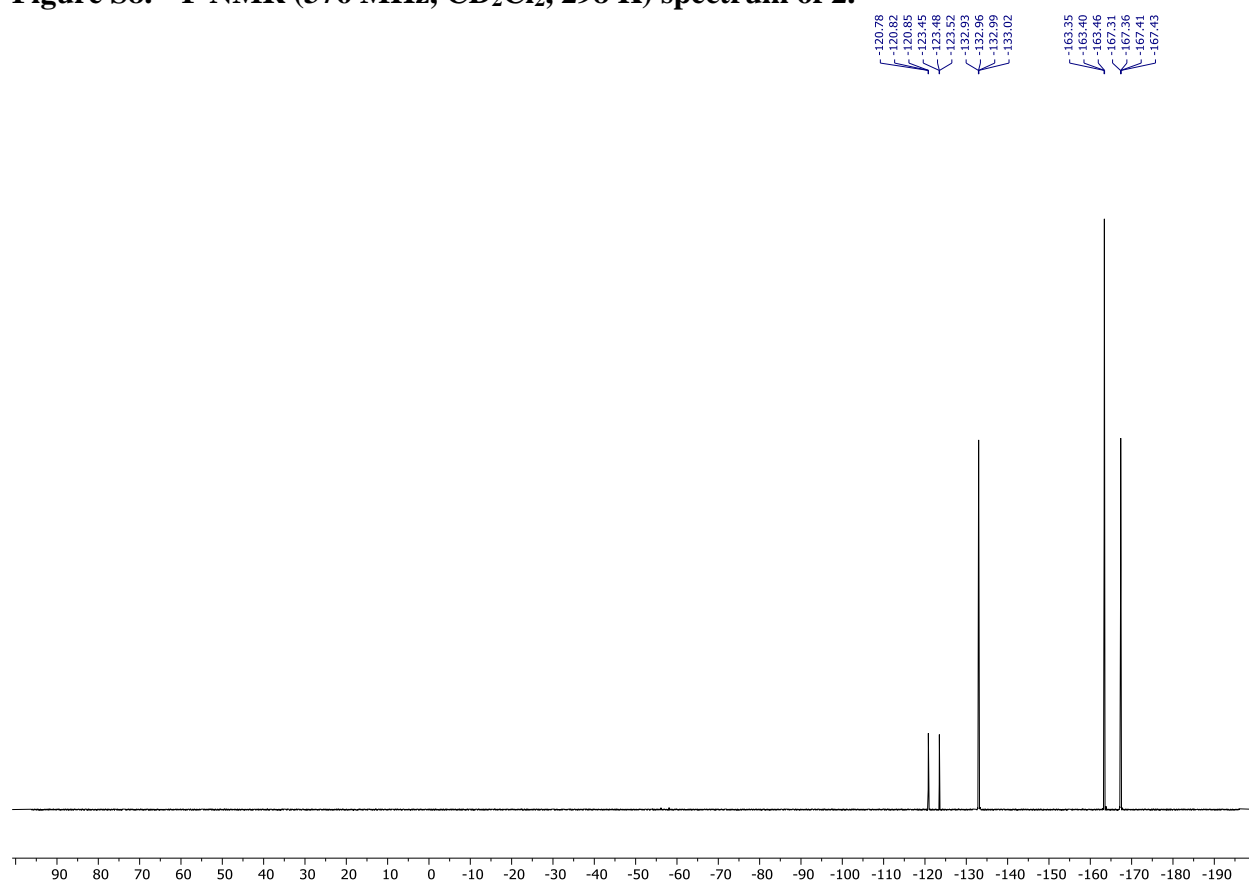

Figure S9.  $^{11}\text{B}$  NMR (128 MHz,  $\text{CD}_2\text{Cl}_2$ , 298 K) spectrum of compound 2.

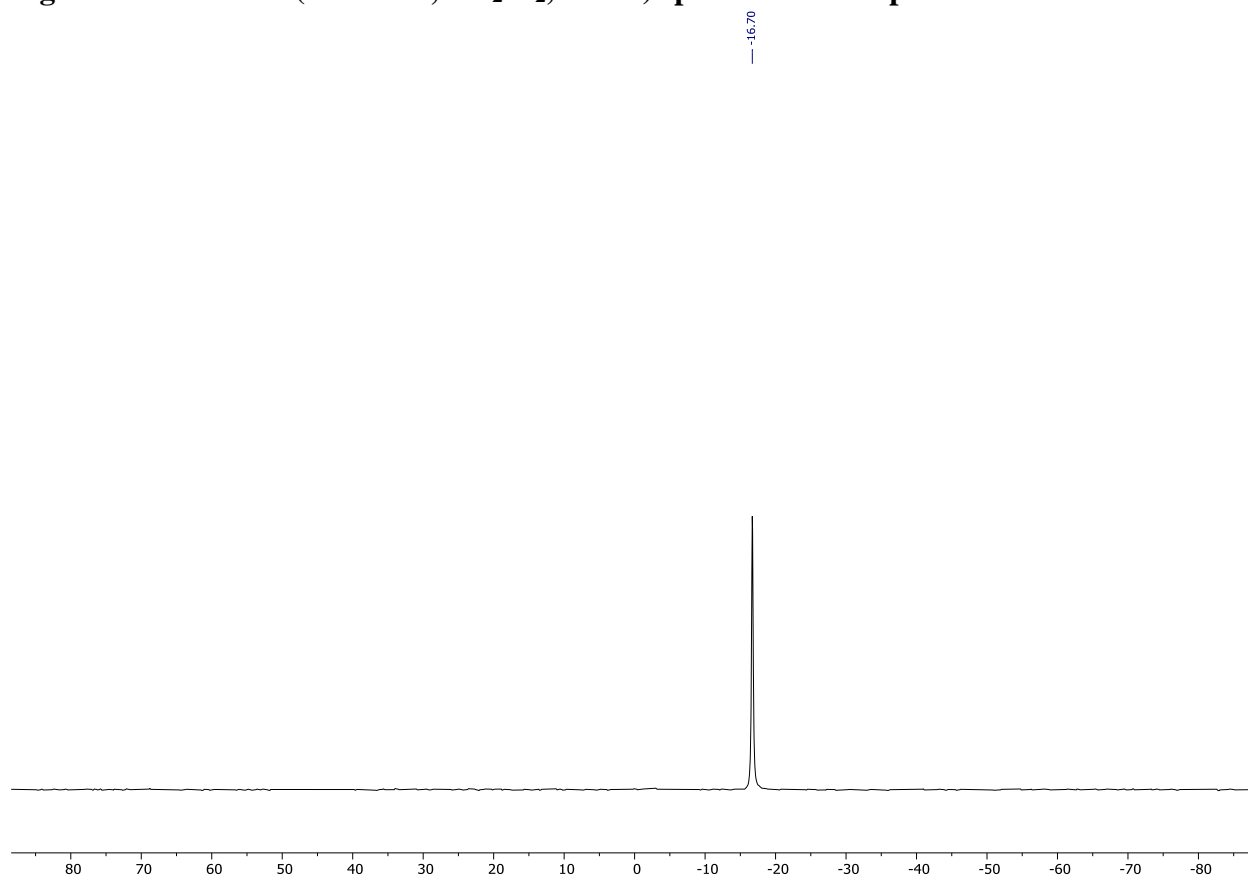

# NMR spectra for $[(C_6H_4)(PPh_2Cl)_2][Cl]_2$ (**3**)

Figure S20.  $^1H$  NMR (500 MHz,  $CD_2Cl_2$ , 298 K) spectrum of **3**.

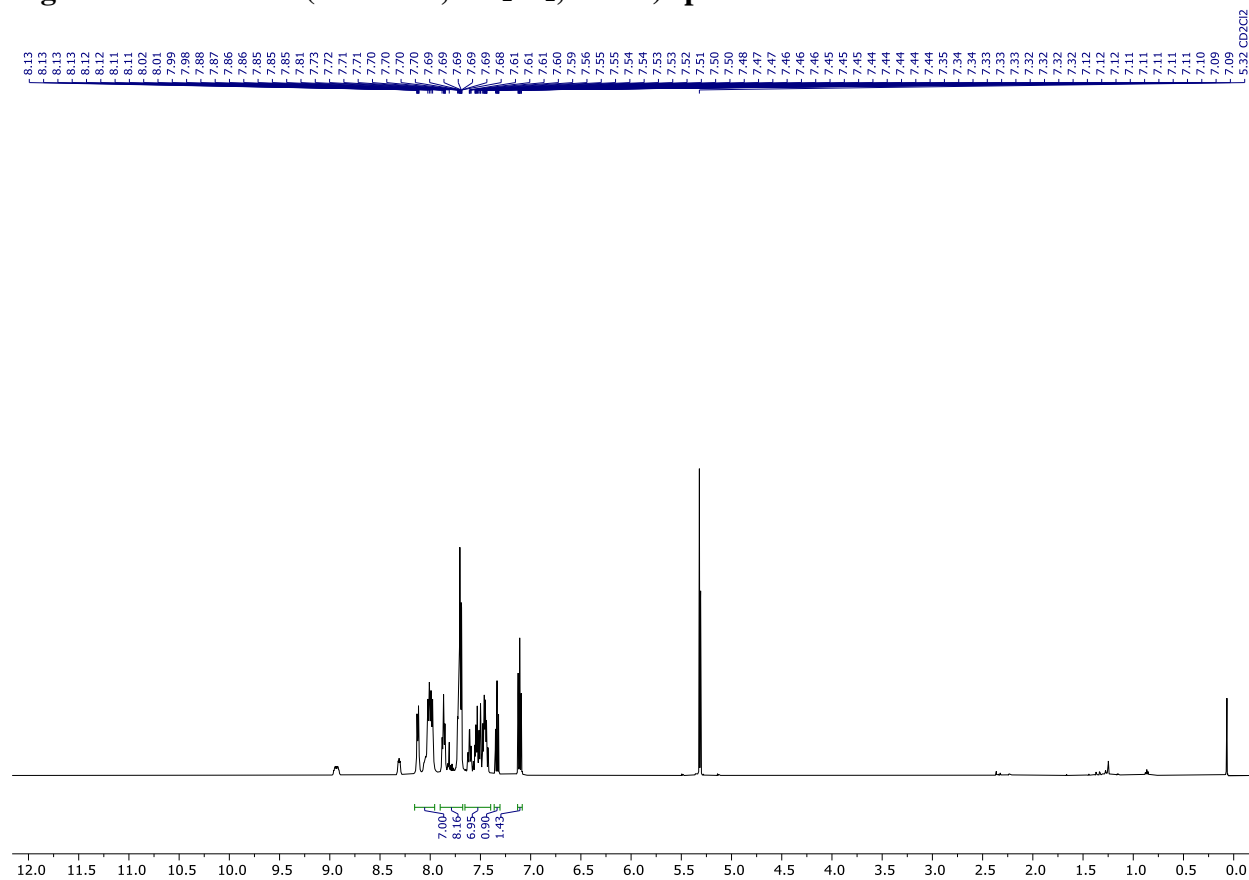

Figure S11.  $^{13}\text{C}\{^1\text{H}\}$  NMR (126 MHz,  $\text{CD}_2\text{Cl}_2$ , 298 K) spectrum of **3**.

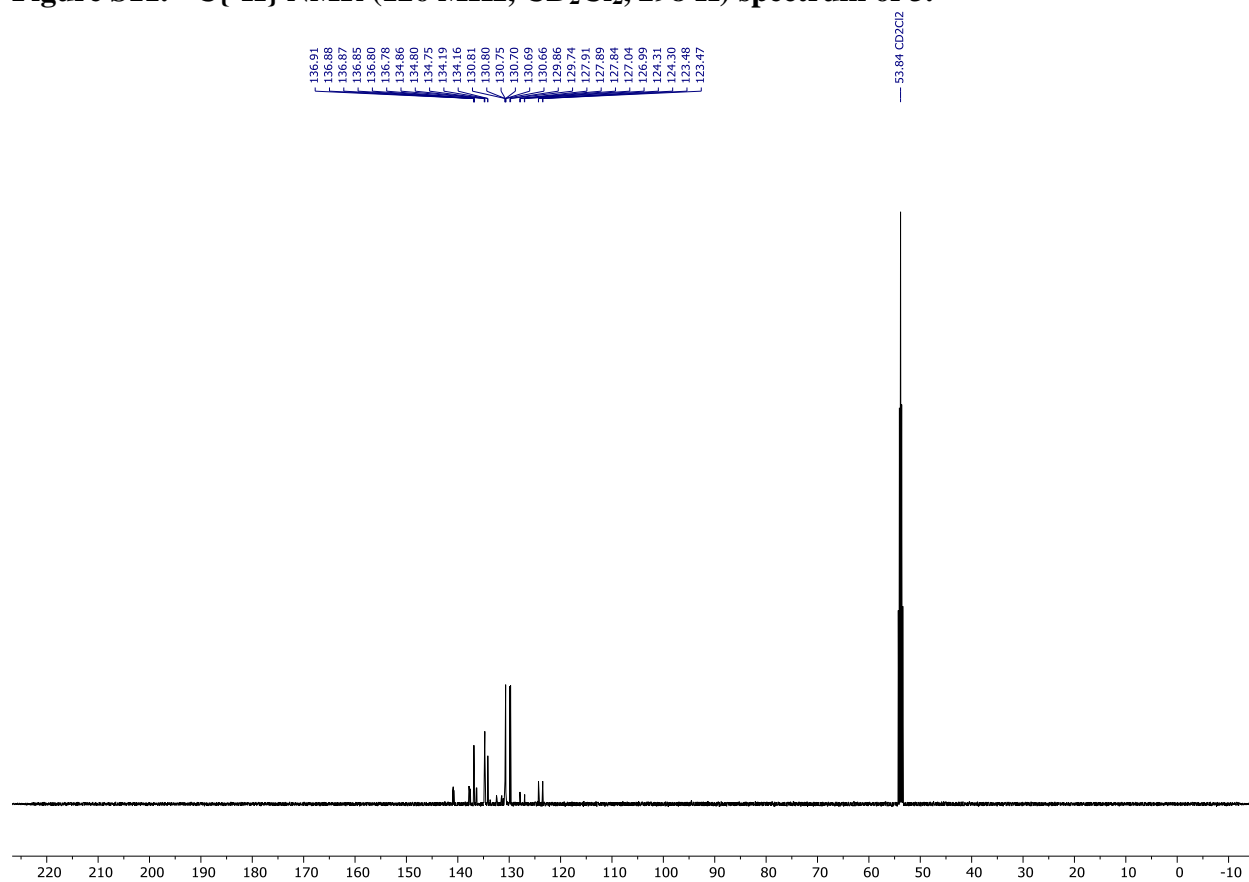

Figure S12.  $^{31}\text{P}\{^1\text{H}\}$  NMR (162 MHz,  $\text{CD}_2\text{Cl}_2$ , 298K) spectrum of 3.

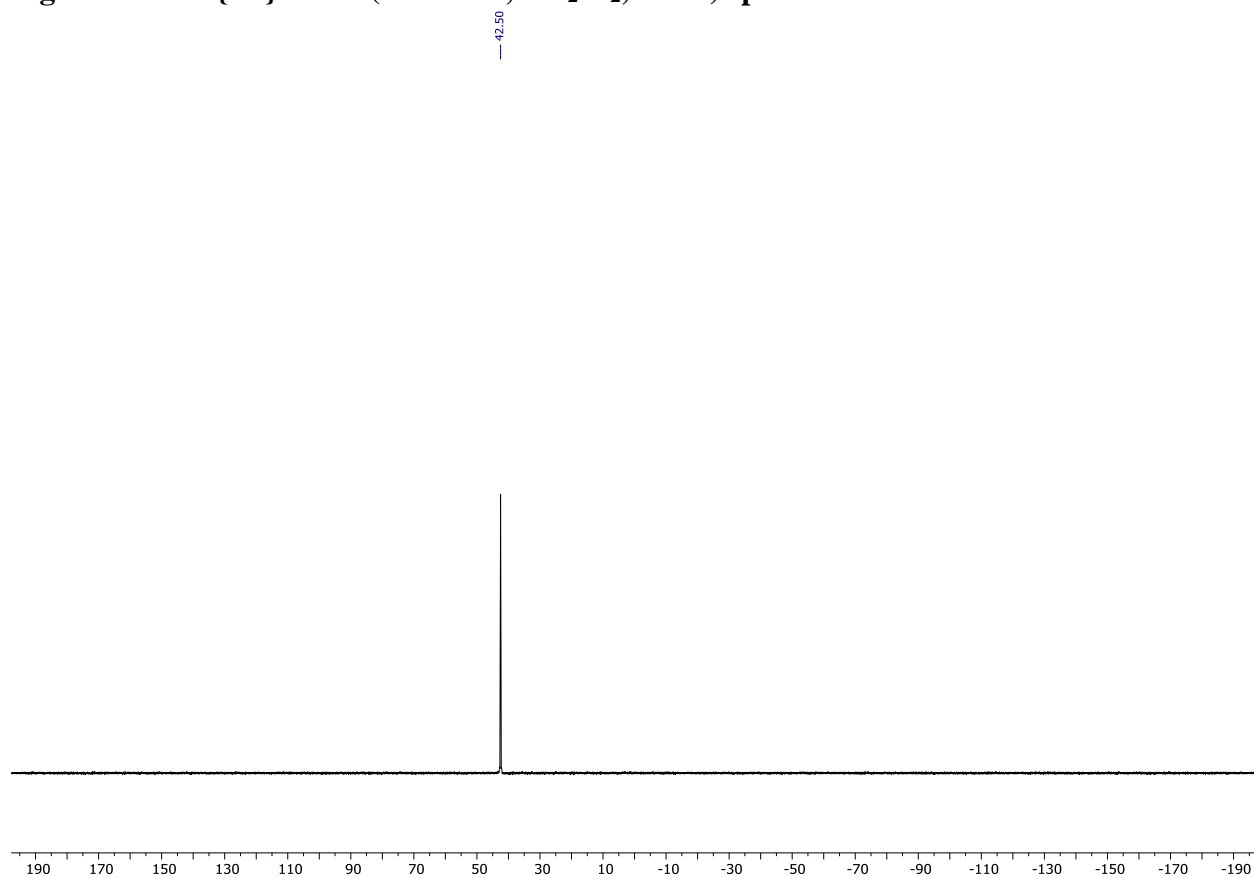

**NMR spectra for  $[(C_6H_4)(PPh_2Cl)_2]_2[BF_{4-n}Cl_n]$  (**3'**)**

**Figure S13.  $^{31}P\{^1H\}$  NMR (162 MHz,  $CH_2Cl_2$ , 298K) spectrum of **3'**.**

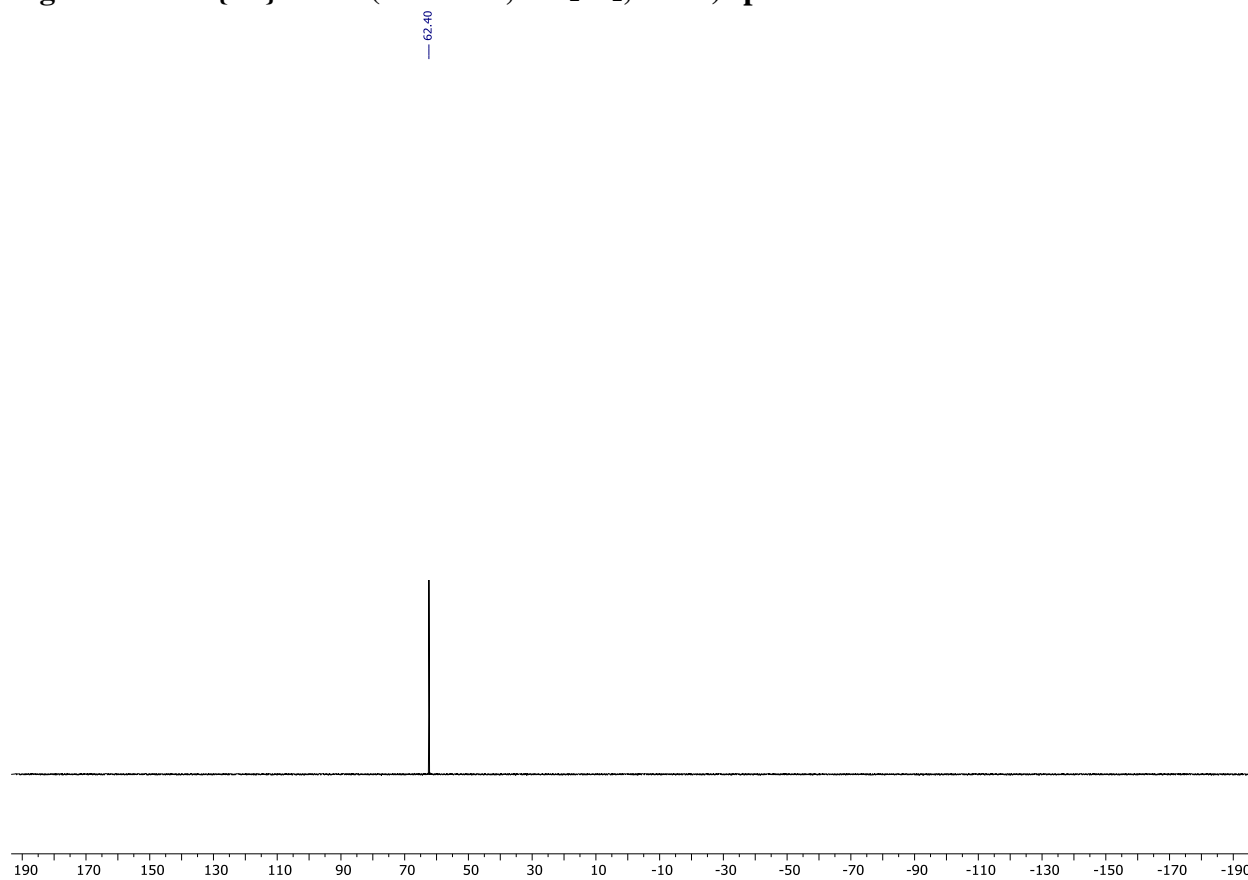

Figure S14.  $^{19}\text{F}$  NMR (376 MHz,  $\text{CH}_2\text{Cl}_2$ , 298 K) spectrum of 3'.

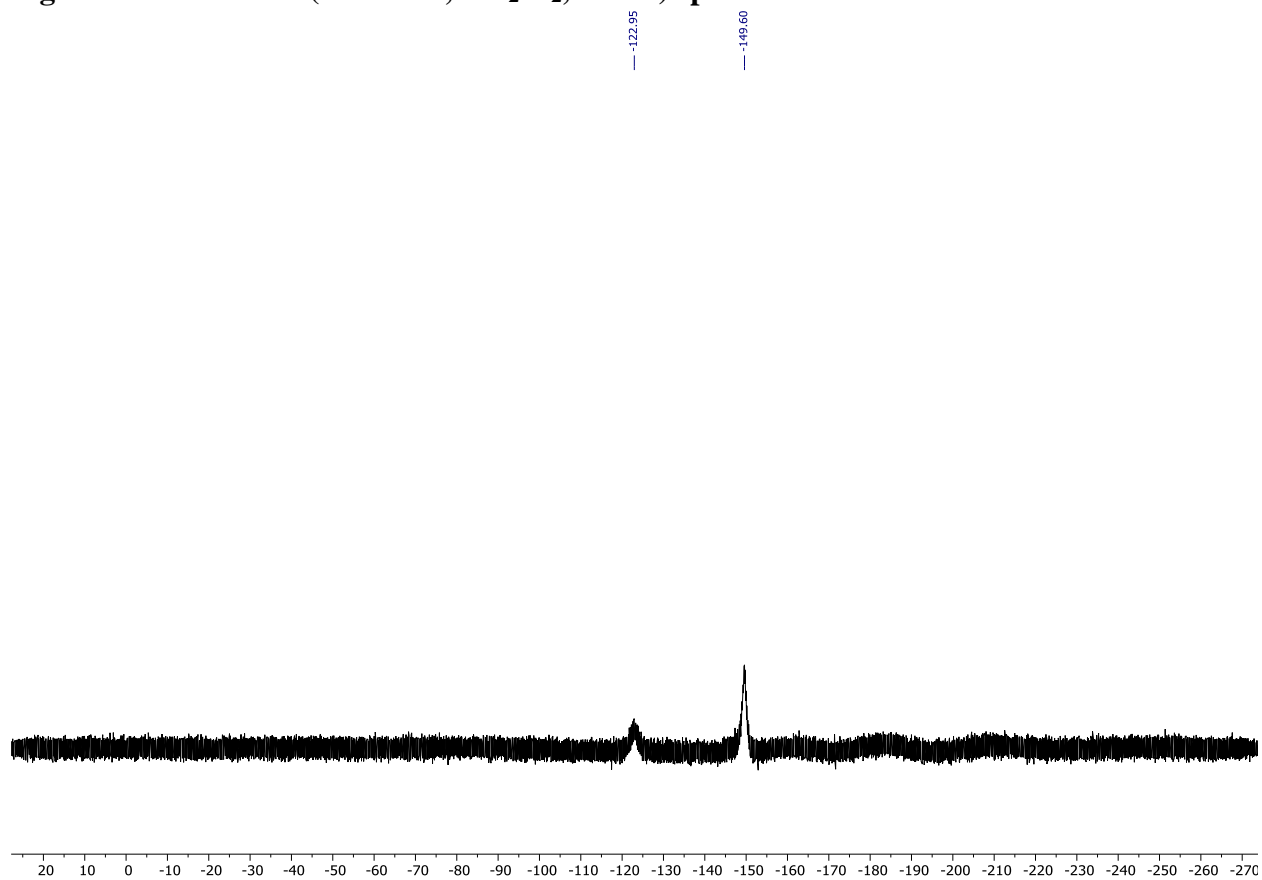



**NMR spectra for  $[(C_6H_4)(PPh_2)_2(\mu-NMe)][B(C_6F_5)_4]_2$  (**4**)**

**Figure S35.  $^1H$  NMR (500 MHz,  $CD_2Cl_2$ , 298 K) spectrum of **4**.**

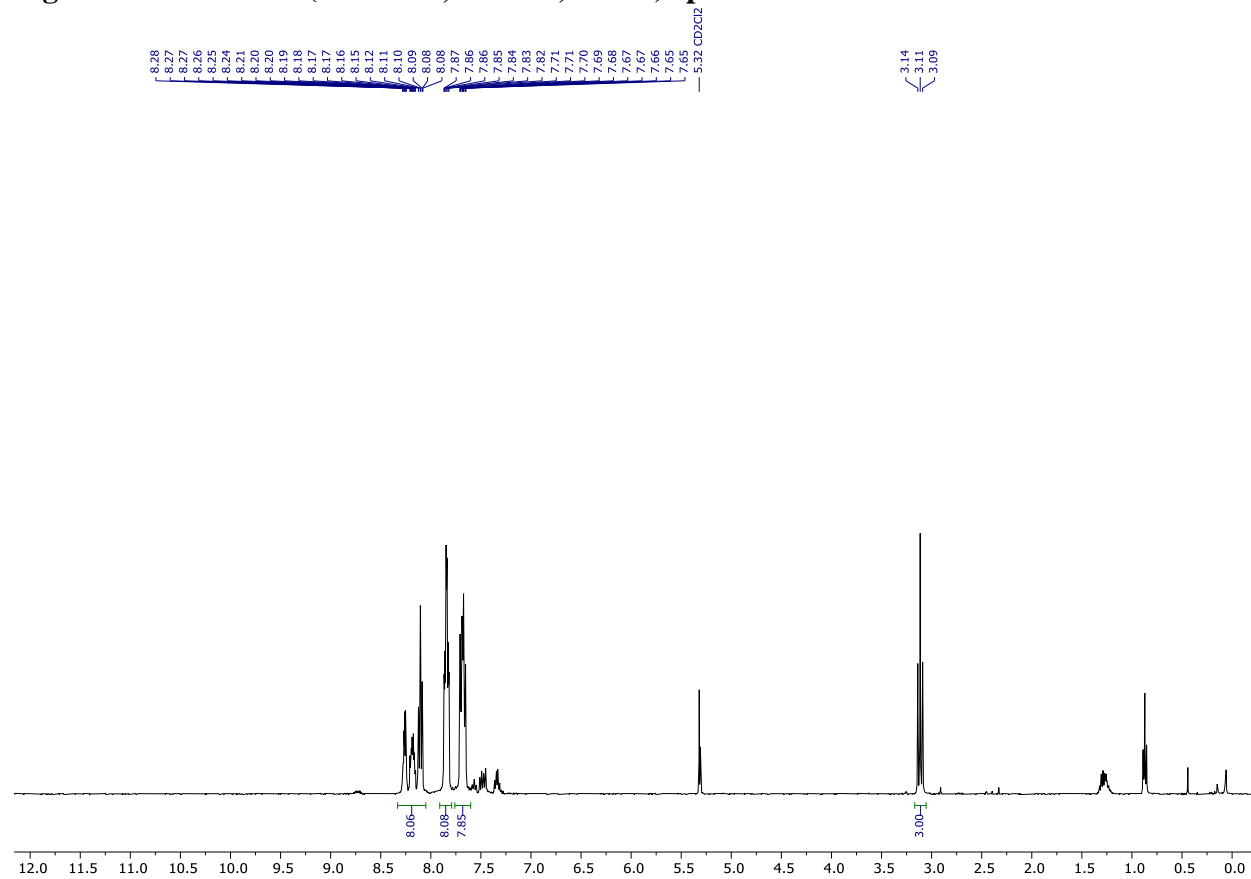

Figure S16.  $^{13}\text{C}\{^1\text{H}\}$  NMR (126 MHz,  $\text{CD}_2\text{Cl}_2$ , 298 K) spectrum of **4**.

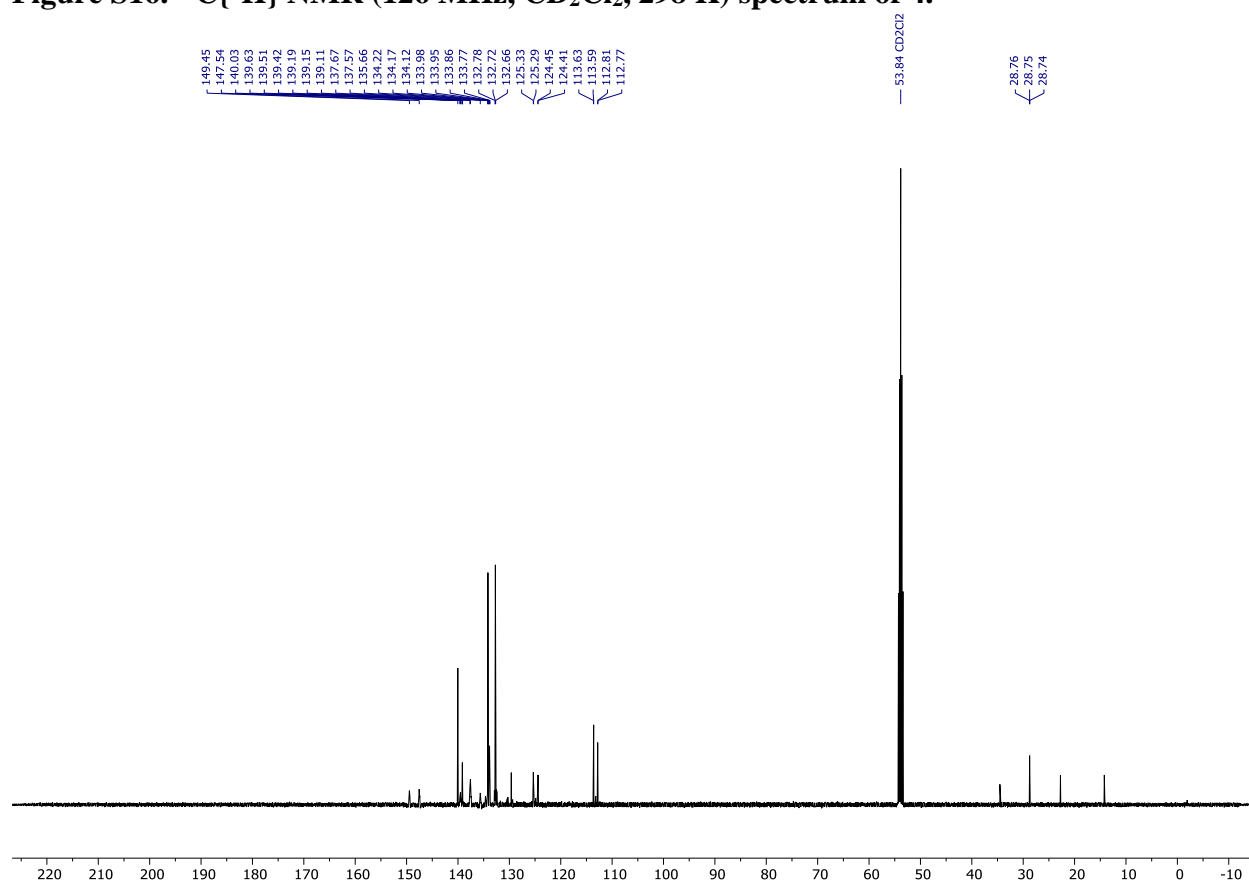

Figure S17.  $^{31}\text{P}\{^1\text{H}\}$  NMR (162 MHz,  $\text{CD}_2\text{Cl}_2$ , 298K) spectrum of 4.

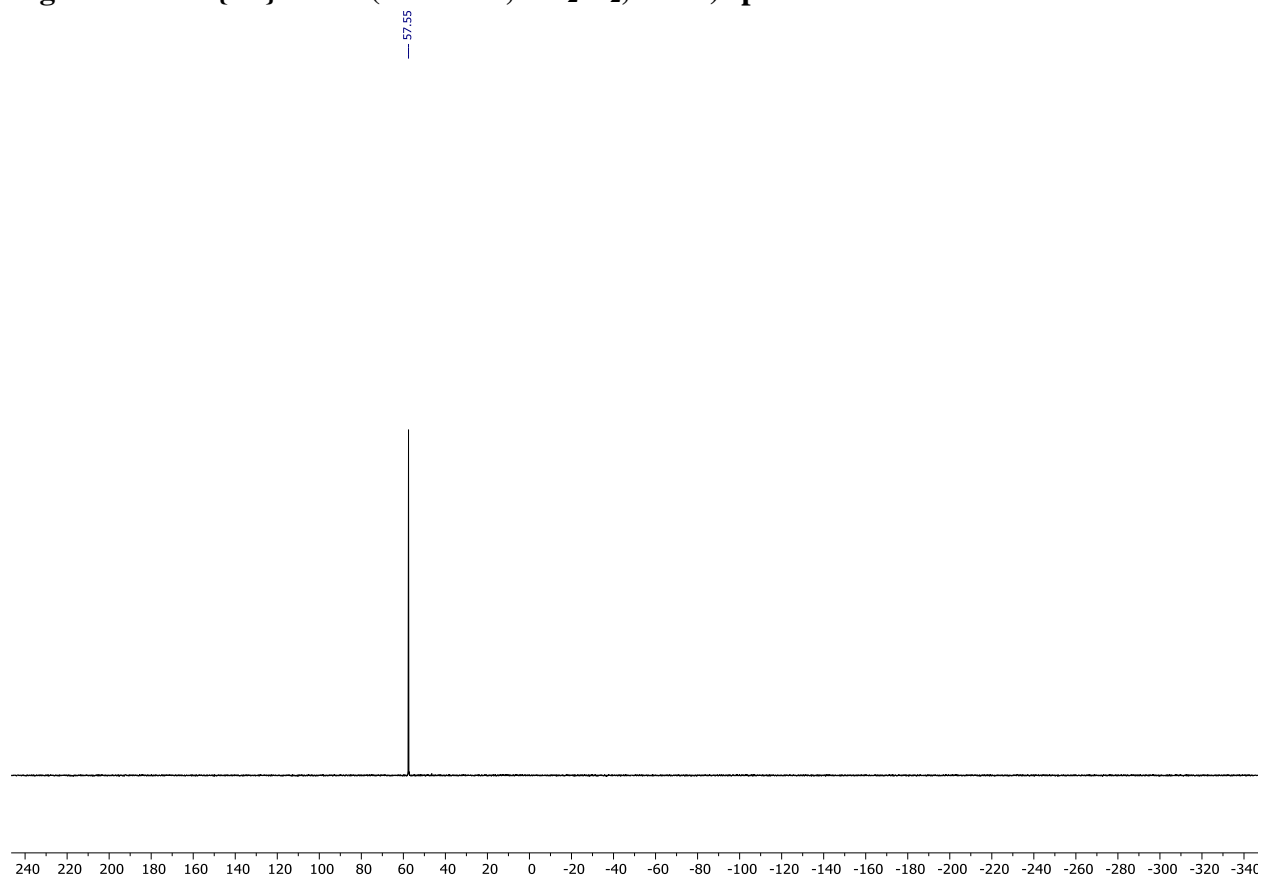

Figure S18.  $^{19}\text{F}$  NMR (376 MHz,  $\text{CD}_2\text{Cl}_2$ , 298 K) spectrum of 4.

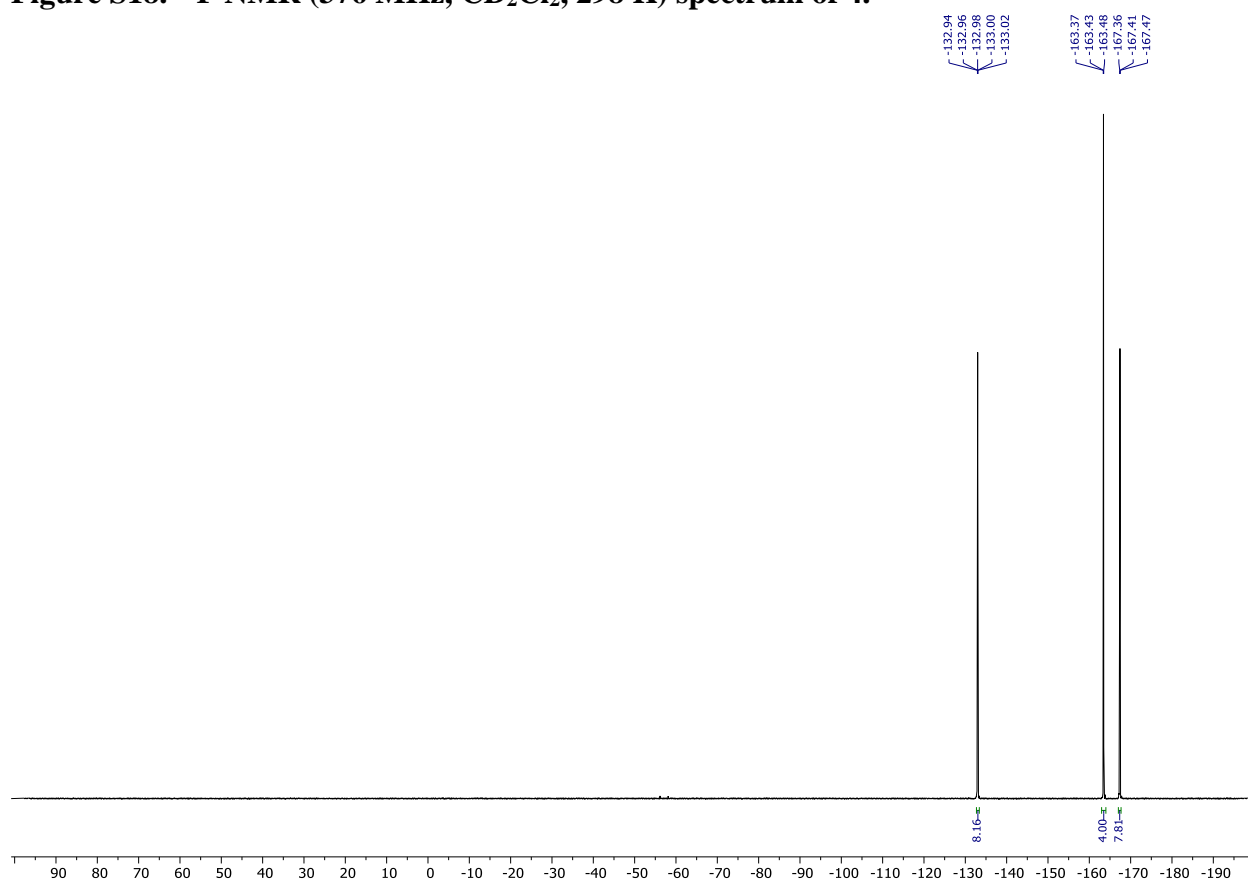

Figure S19.  $^{11}\text{B}$  NMR (128 MHz,  $\text{CD}_2\text{Cl}_2$ , 298 K) spectrum of compound 4.

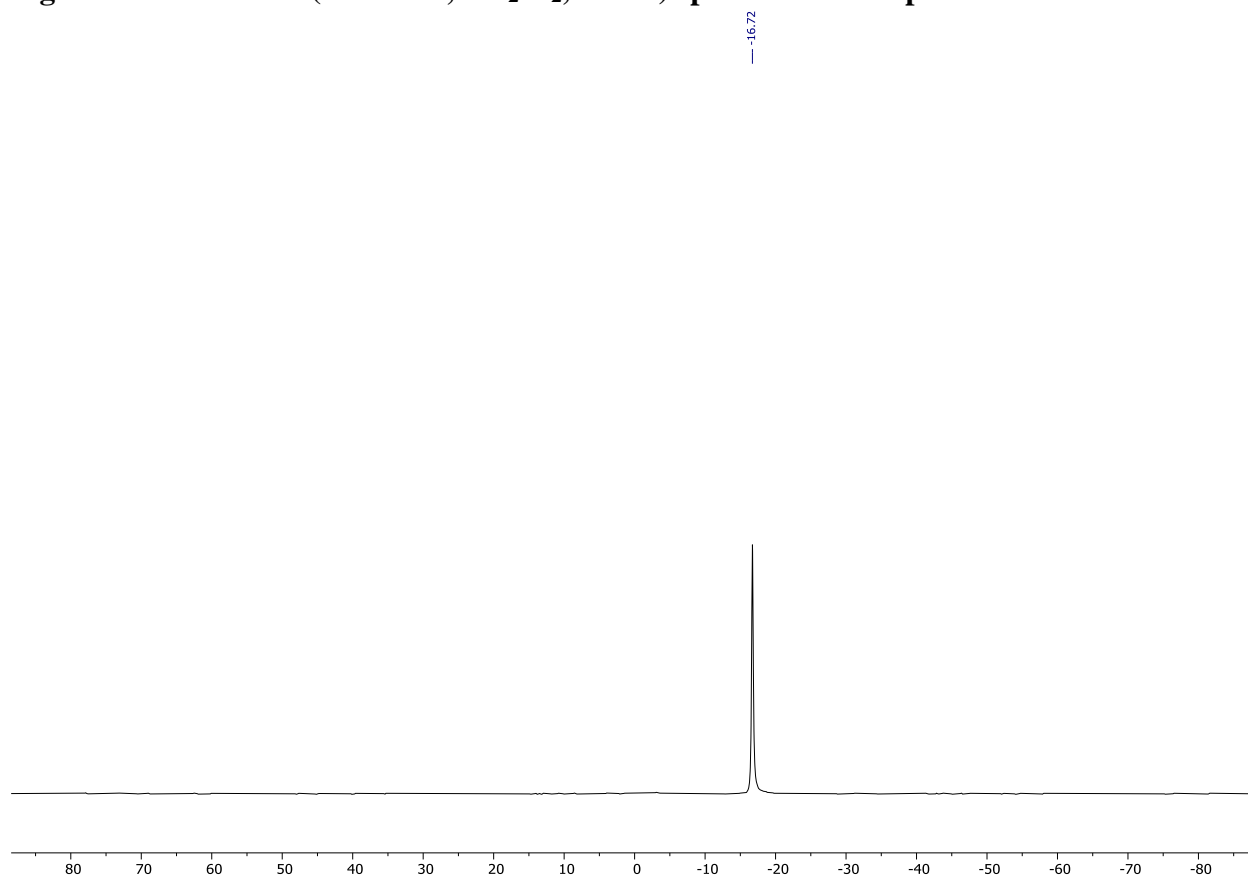

# NMR spectra for $[(C_6H_4)(PPh_2NMe_2)_2][Cl]_2$ (5)

Figure S20.  $^1H$  NMR (500 MHz,  $CD_2Cl_2$ , 298 K) spectrum of 5.

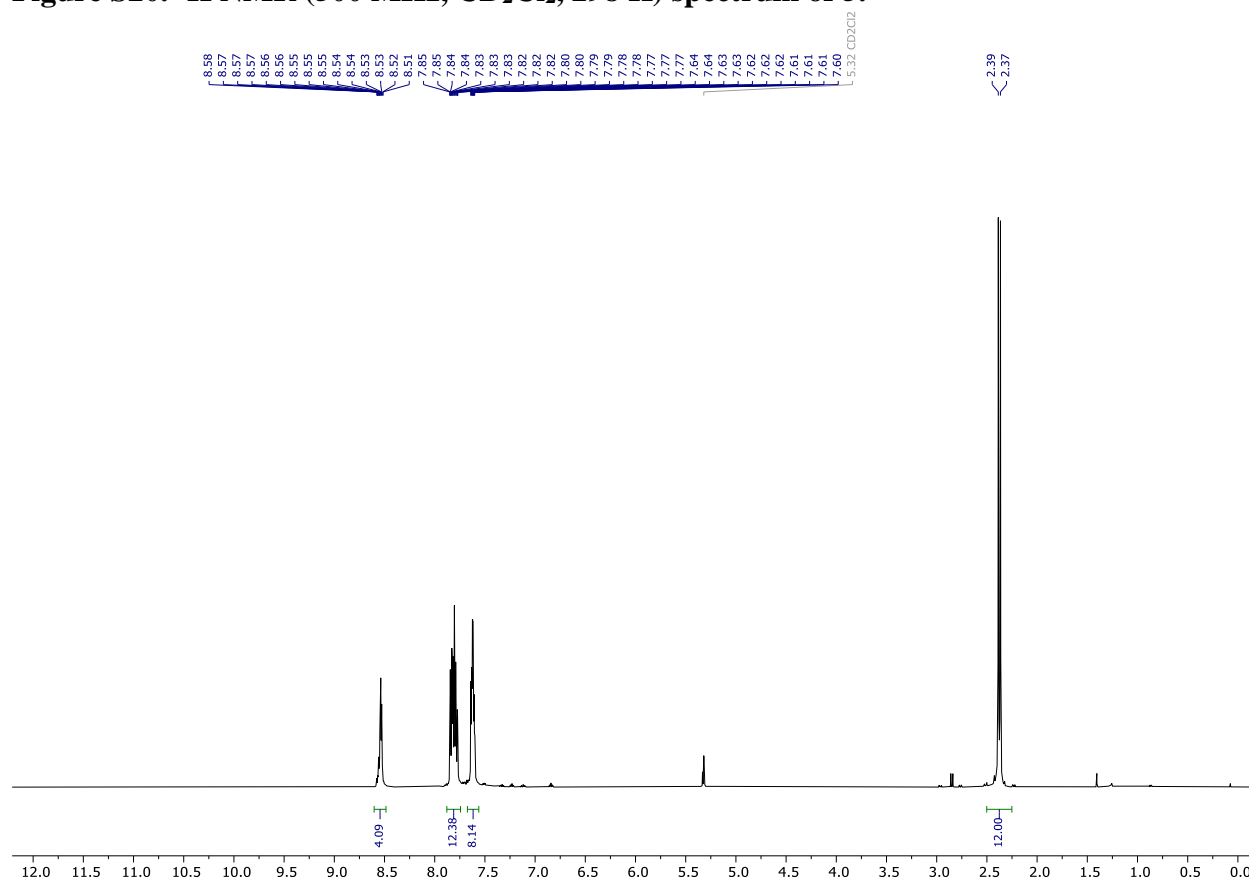

Figure S21.  $^{13}\text{C}\{^1\text{H}\}$  NMR (126 MHz,  $\text{CD}_2\text{Cl}_2$ , 298 K) spectrum of 5.

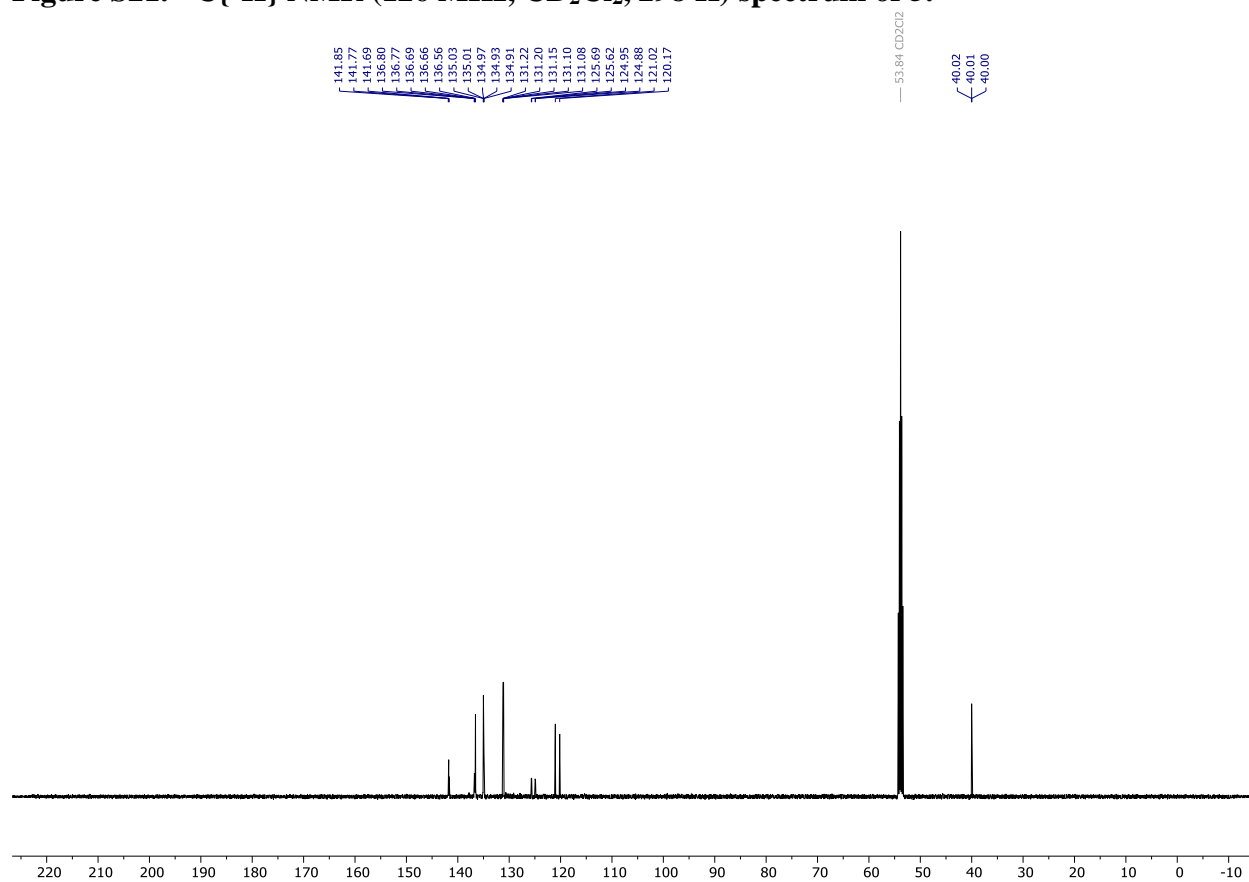

Figure S22.  $^{31}\text{P}\{^1\text{H}\}$  NMR (162 MHz,  $\text{CD}_2\text{Cl}_2$ , 298K) spectrum of 5.

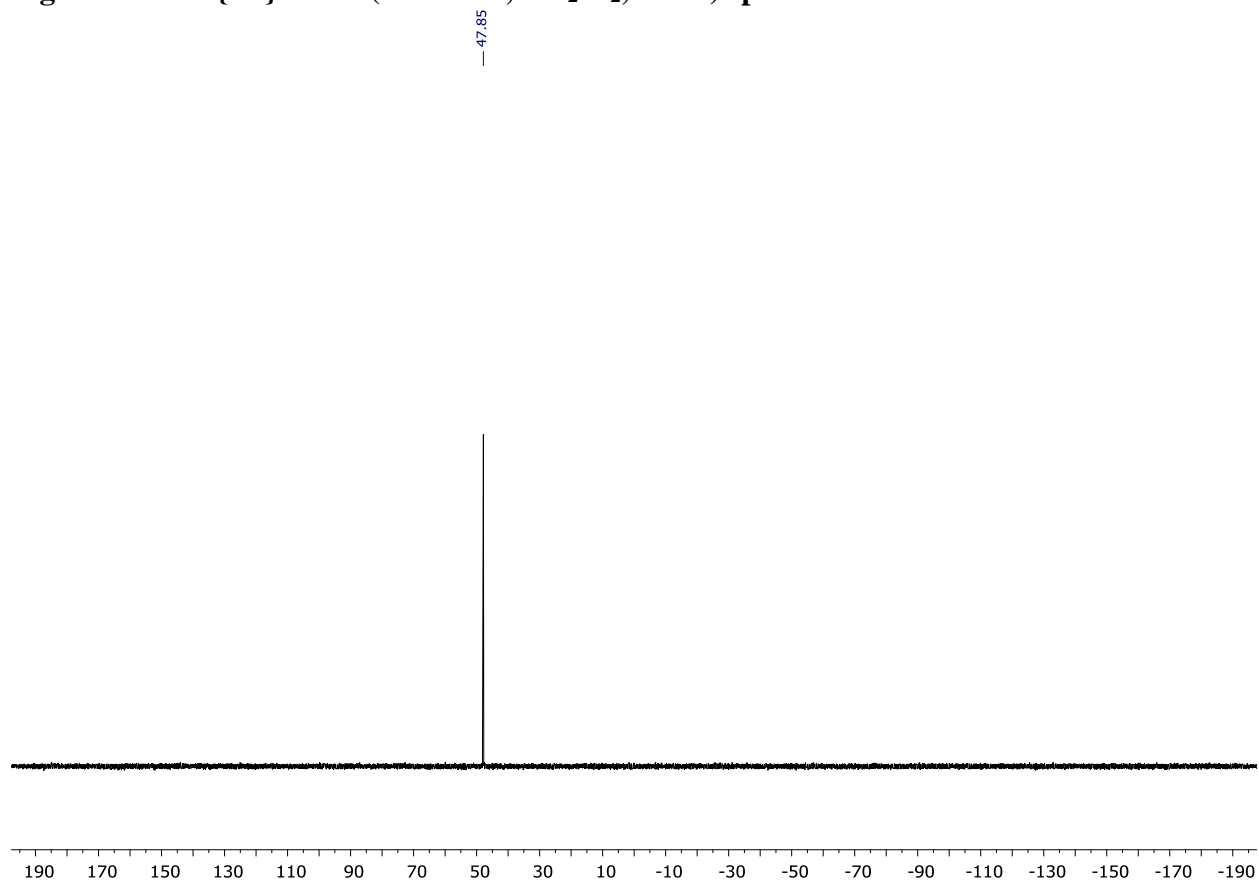



# NMR spectra for $[(C_6H_4)(PPh_2)_2(\mu-N)[Cl]]$ (**6**)

Figure S23.  $^1H$  NMR (500 MHz,  $CD_2Cl_2$ , 298 K) spectrum of **6**.

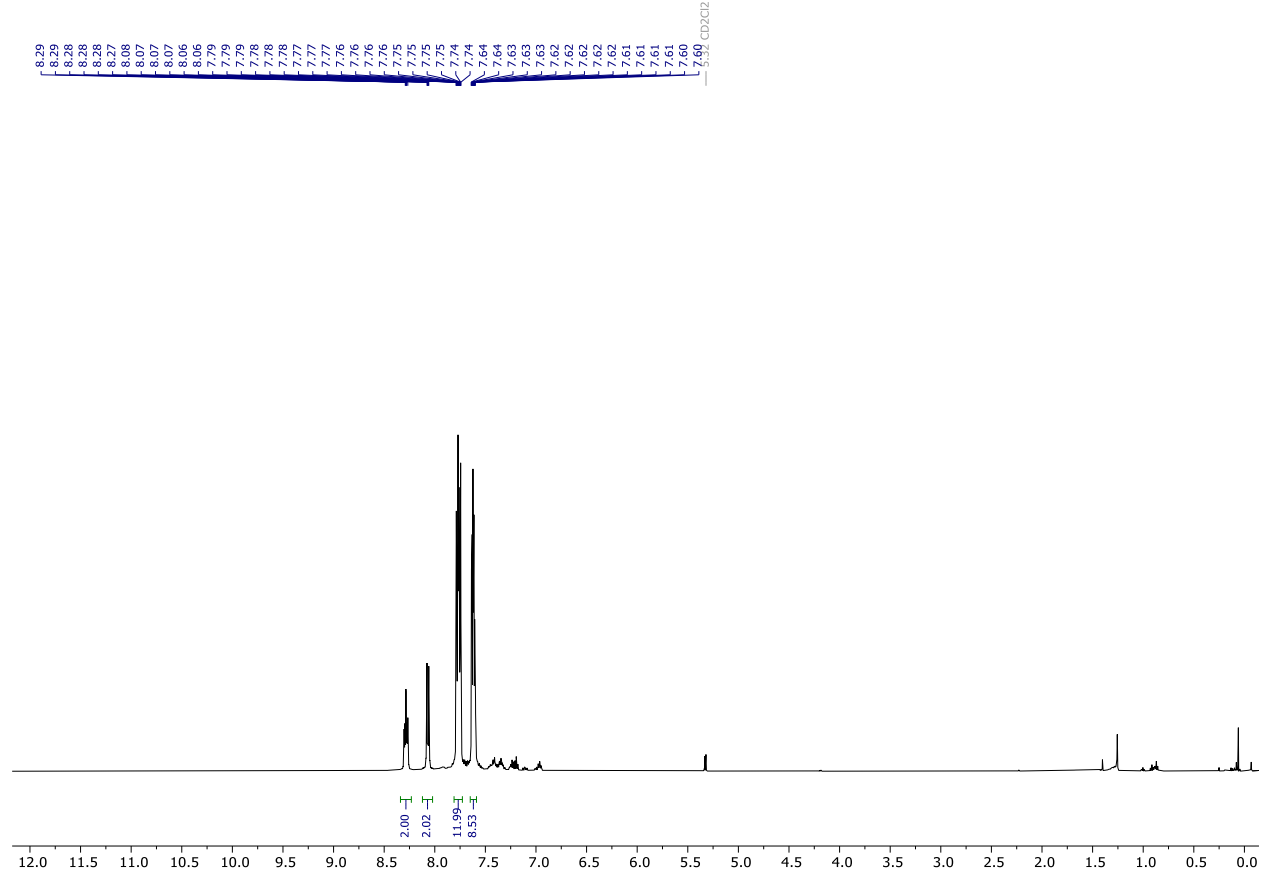

Figure S24.  $^{13}\text{C}\{^1\text{H}\}$  NMR (126 MHz,  $\text{CD}_2\text{Cl}_2$ , 298 K) spectrum of **6**.

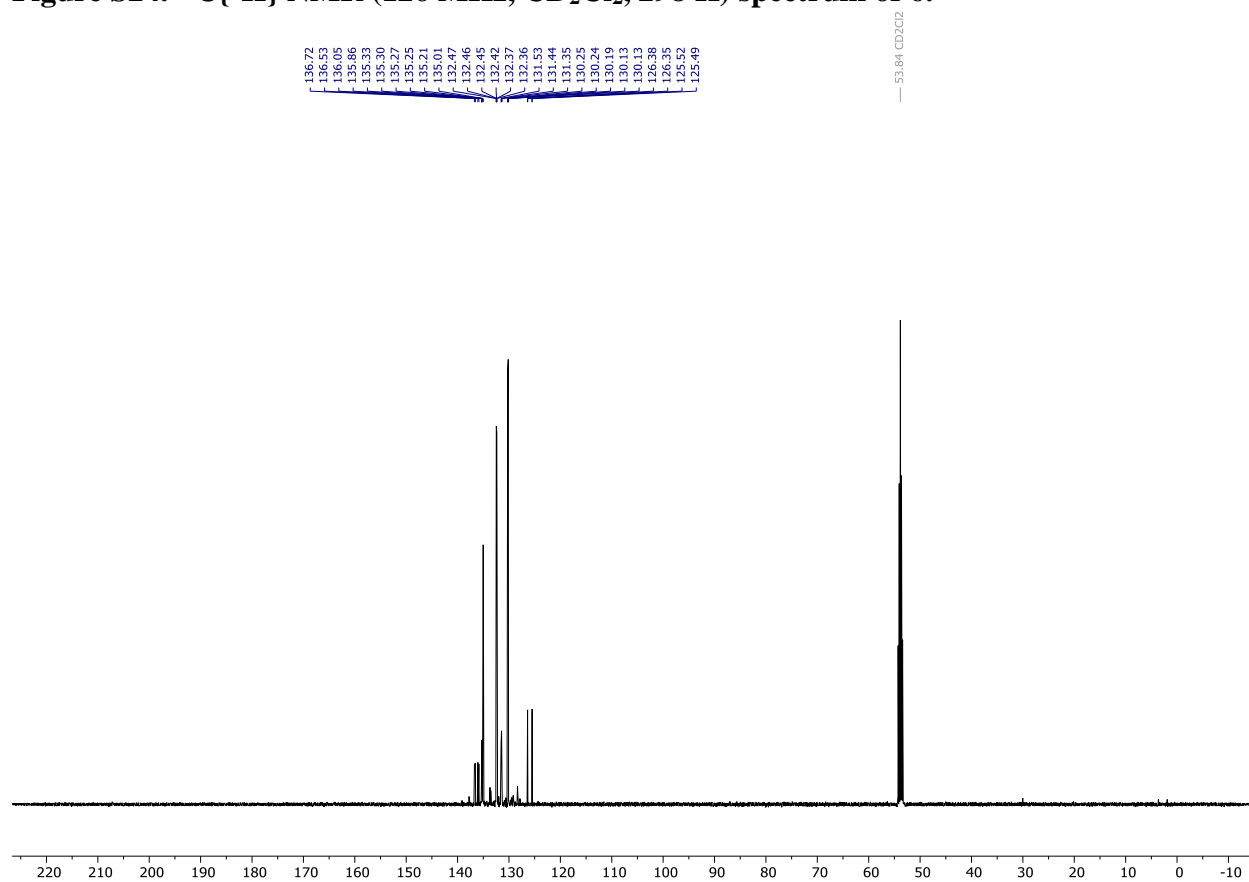

Figure S25.  $^{31}\text{P}\{^1\text{H}\}$  NMR (162 MHz,  $\text{CD}_2\text{Cl}_2$ , 298K) spectrum of **6**.

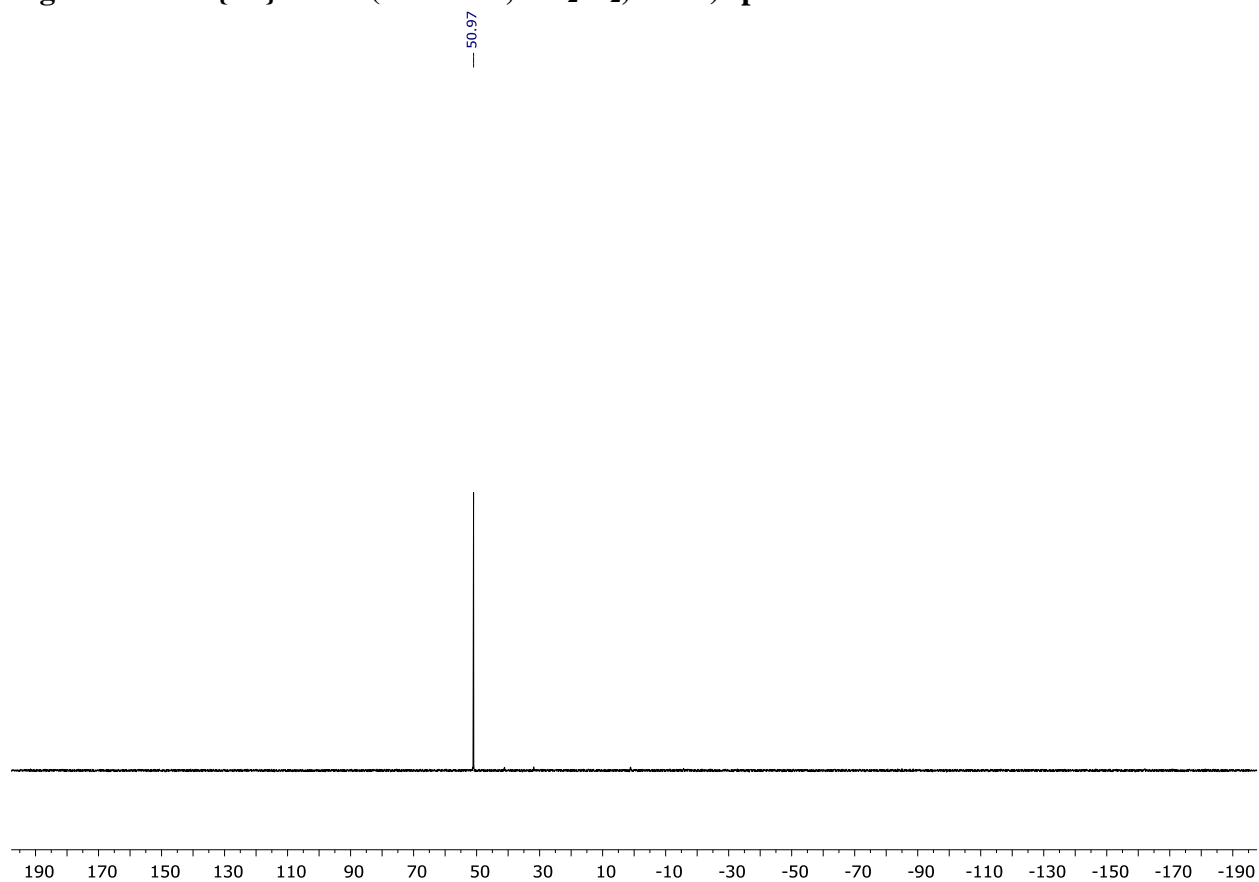

## NMR spectra for the reaction of Compound 3 with $(\text{Me}_3\text{Si})_2\text{NMe}$

Figure S26. A)  $^1\text{H}$  NMR spectrum in  $\text{CH}_2\text{Cl}_2$  of crude reaction mixture (A) and reaction mixture after exposure to high vacuum (B).

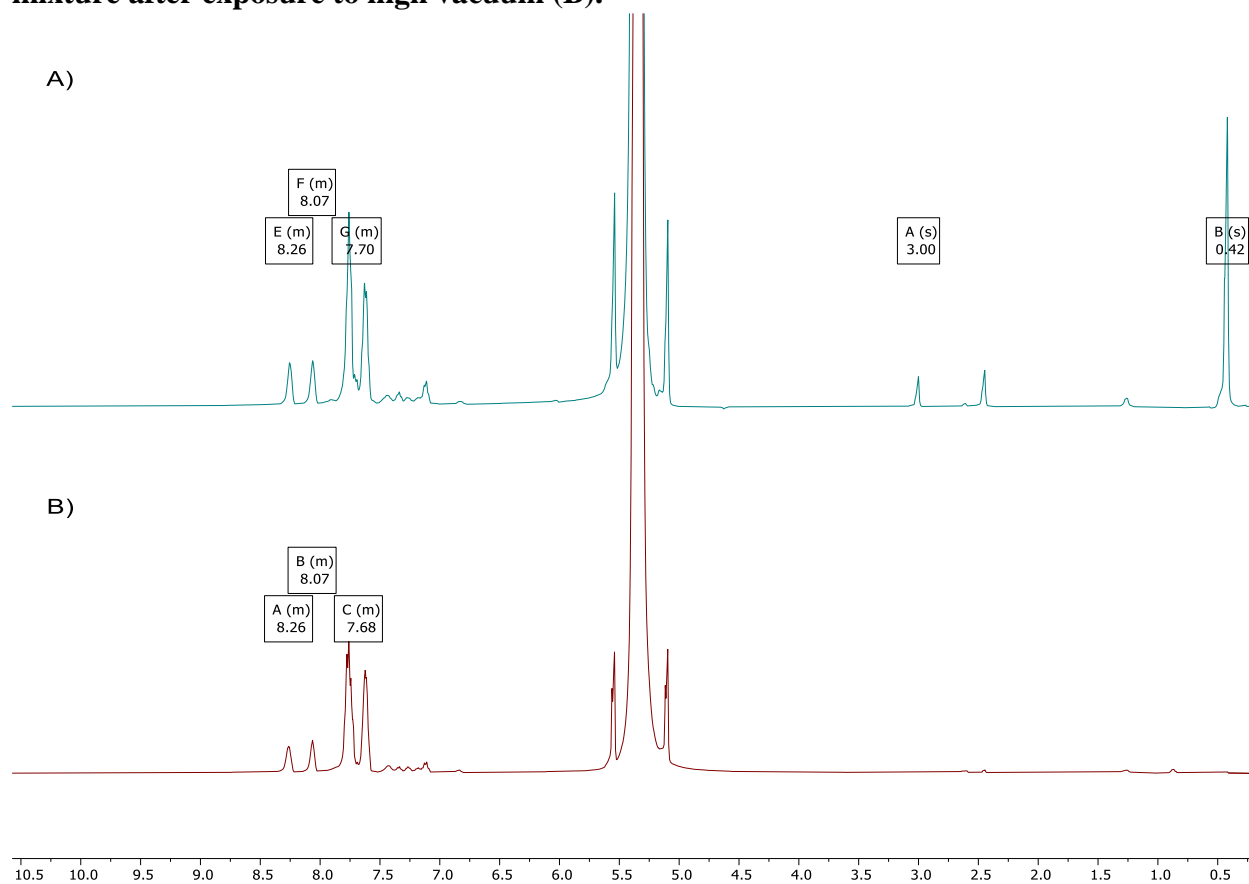

Figure S27.  $^{31}\text{P}\{^1\text{H}\}$  NMR spectrum in  $\text{CH}_2\text{Cl}_2$  of 3 (A) and reaction mixture indicating formation of 6 (B).

A)

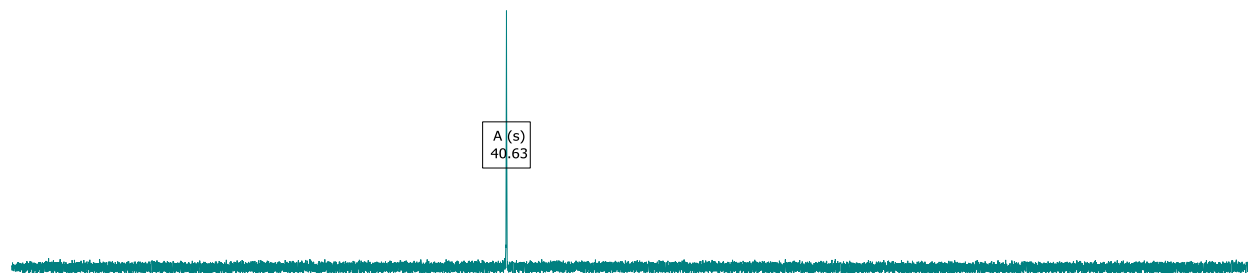

B)

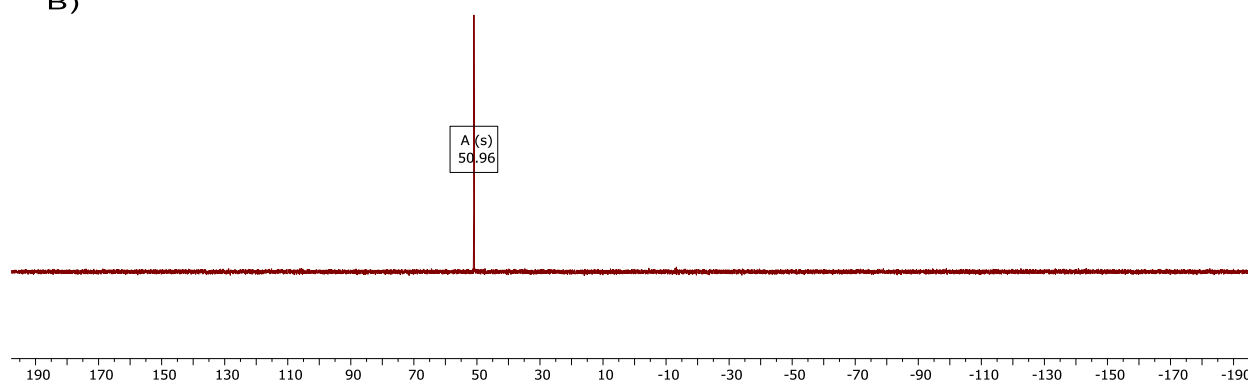

## NMR spectra for the reaction of Compound 4 with [nBu<sub>4</sub>N][Cl]

Figure S28. A) <sup>1</sup>H NMR spectrum in CH<sub>2</sub>Cl<sub>2</sub> of crude reaction mixture (A) and reaction mixture after exposure to high vacuum (B).

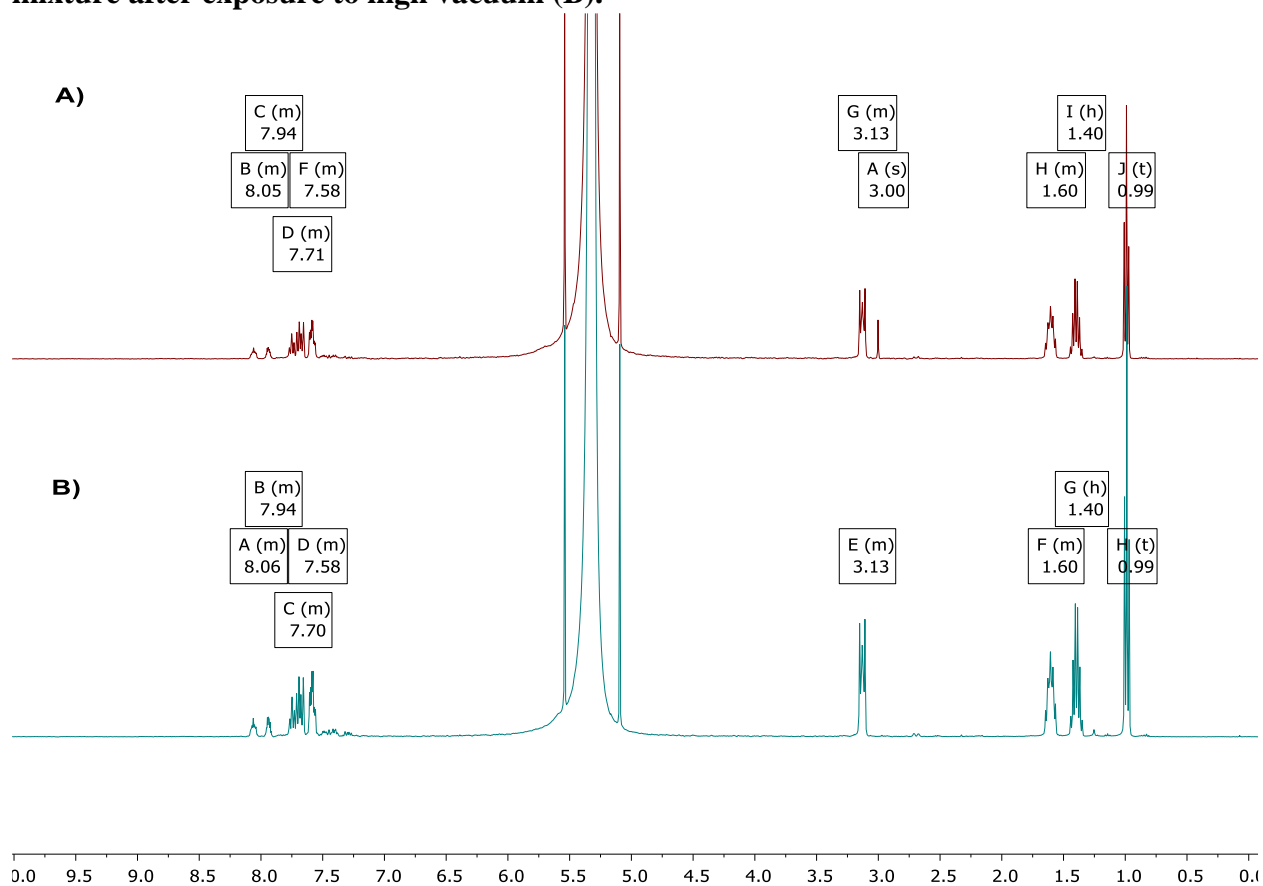

Figure S29.  $^{31}\text{P}\{^1\text{H}\}$  NMR spectrum in  $\text{CH}_2\text{Cl}_2$  of **4** (A) and reaction mixture indicating formation of **6'** (B).

A)

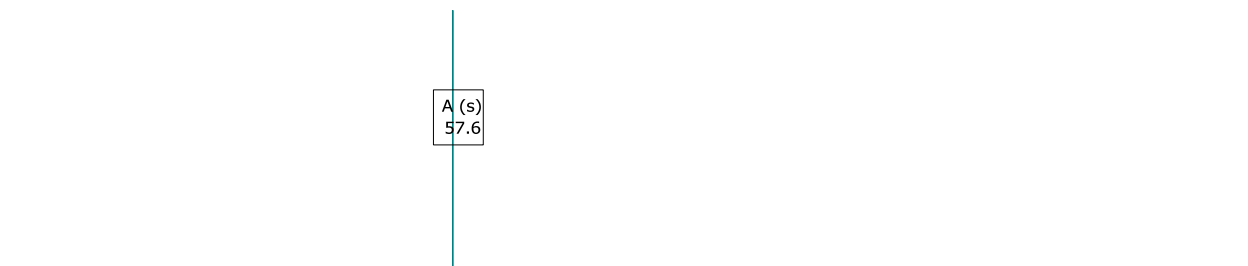

B)

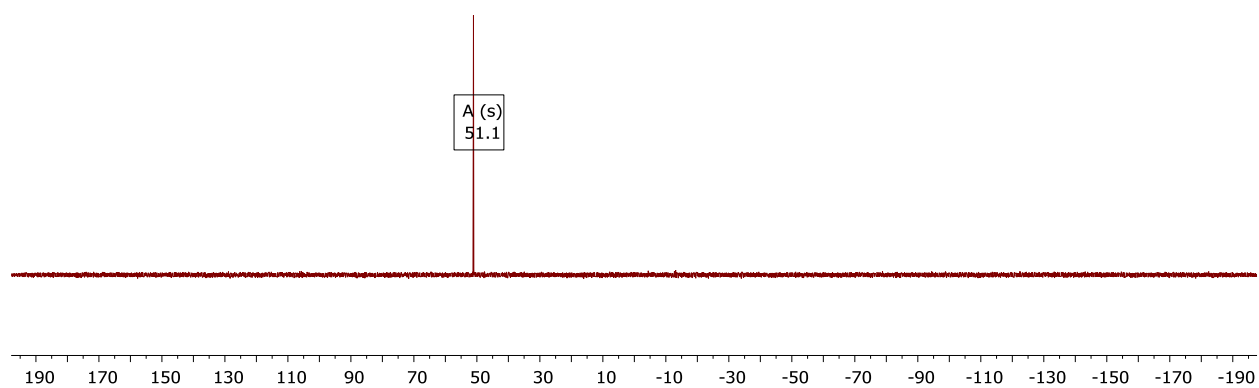

# NMR spectra for $[(\text{CH}_2\text{PPh}_2)_2\text{NMe}][\text{B}(\text{C}_6\text{F}_5)_4]_2$ (**8**)

Figure S30.  $^1\text{H}$  NMR (500 MHz,  $\text{CD}_2\text{Cl}_2$ , 298 K) spectrum of **8**.

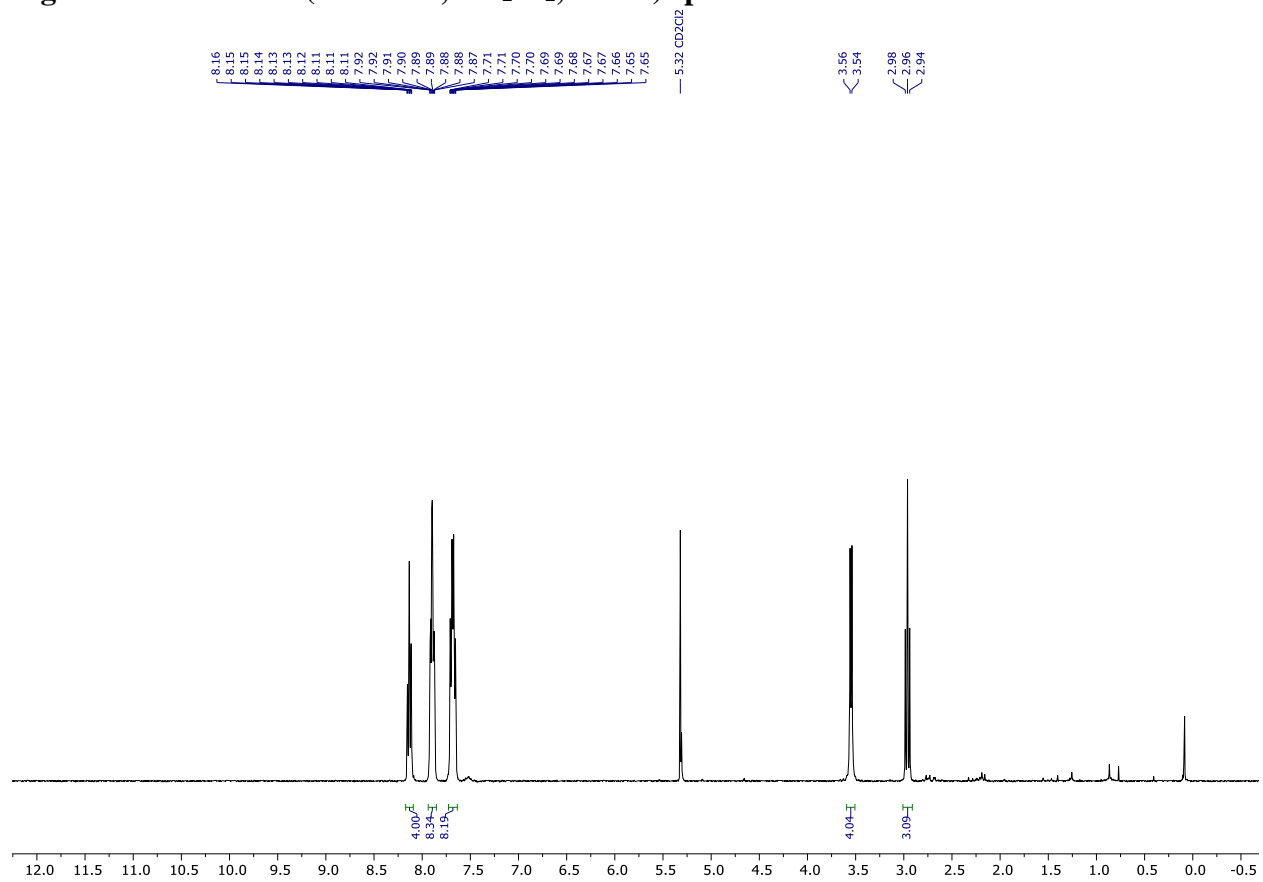



Figure S31.  $^{13}\text{C}\{^1\text{H}\}$  NMR (126 MHz,  $\text{CD}_2\text{Cl}_2$ , 298 K) spectrum of **8**.

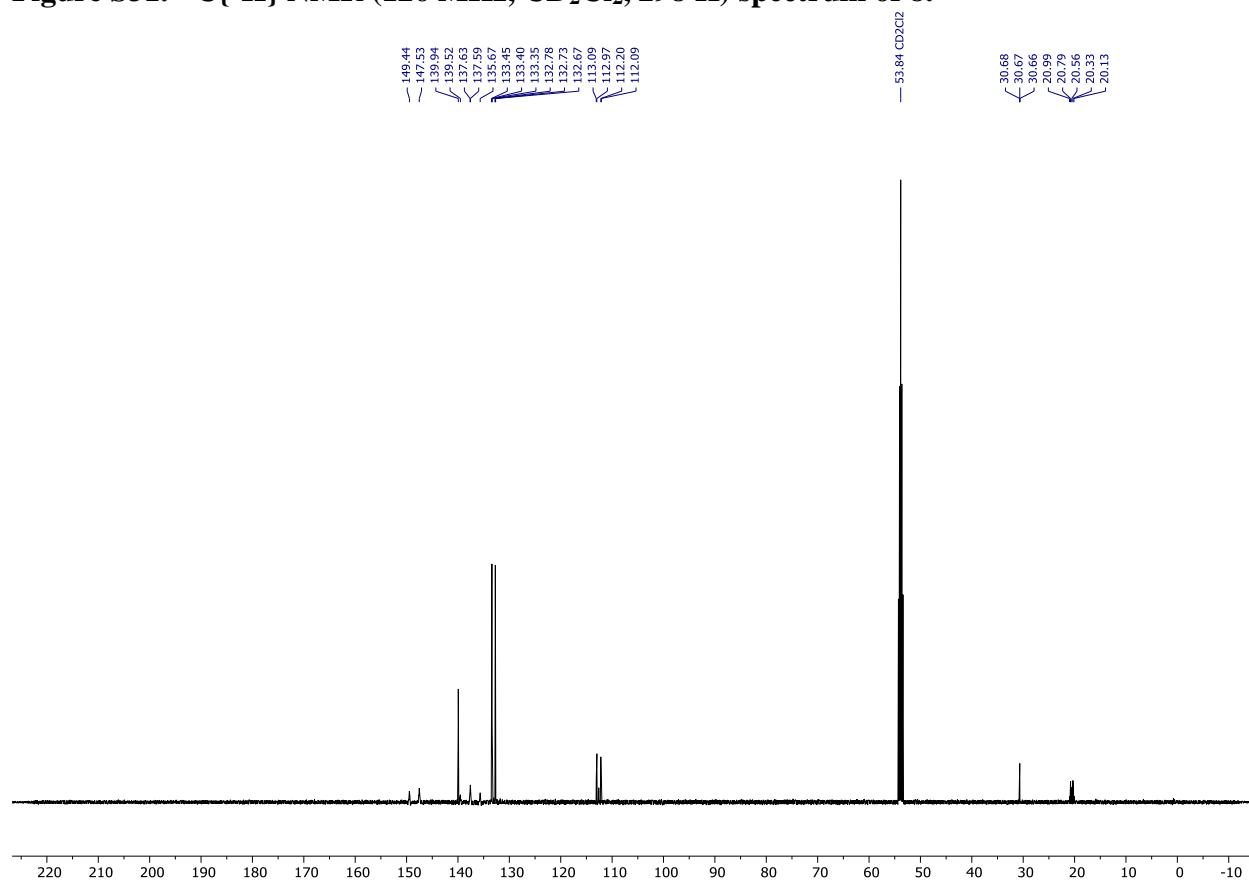

Figure S32.  $^{31}\text{P}\{^1\text{H}\}$  NMR (162 MHz,  $\text{CD}_2\text{Cl}_2$ , 298K) spectrum of **8**.

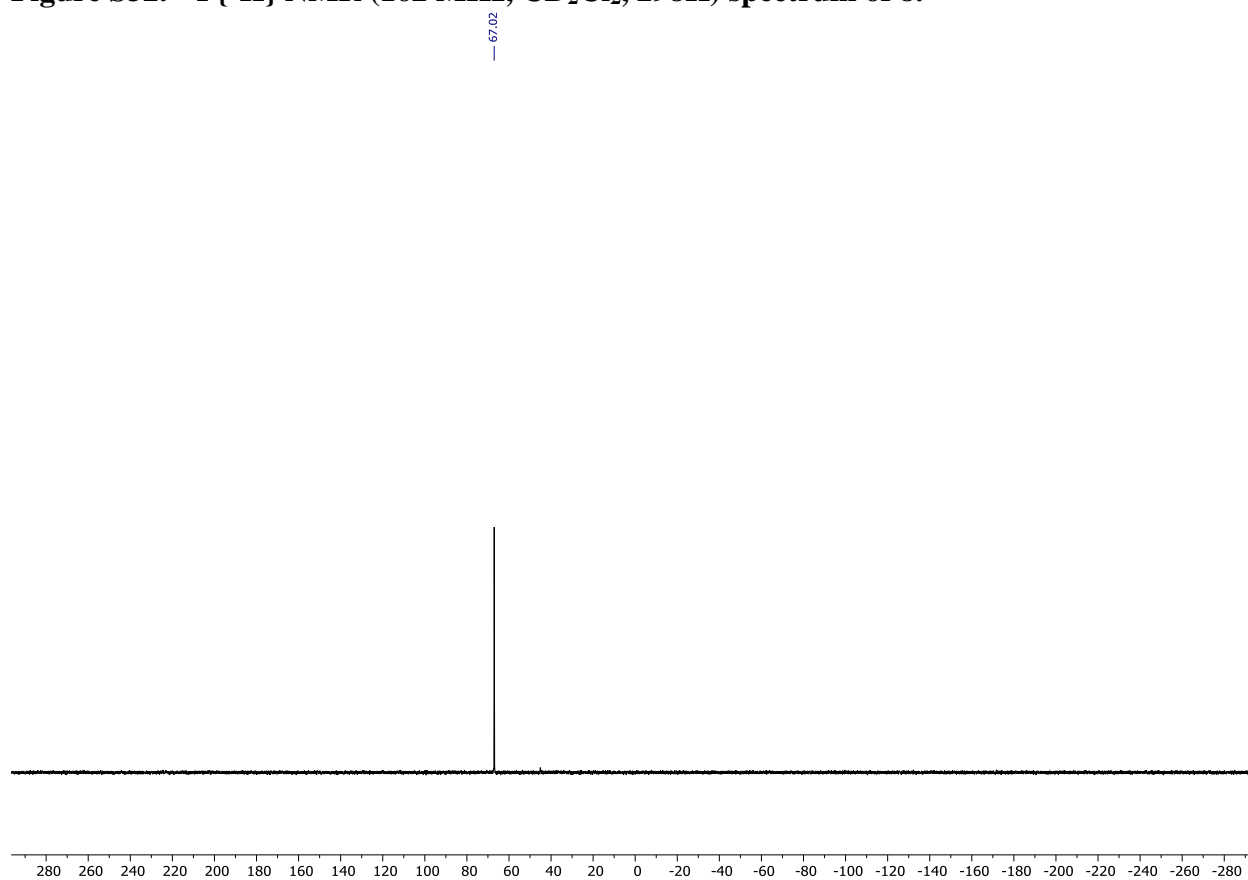

Figure S33.  $^{19}\text{F}$  NMR (376 MHz,  $\text{CD}_2\text{Cl}_2$ , 298 K) spectrum of **8**.

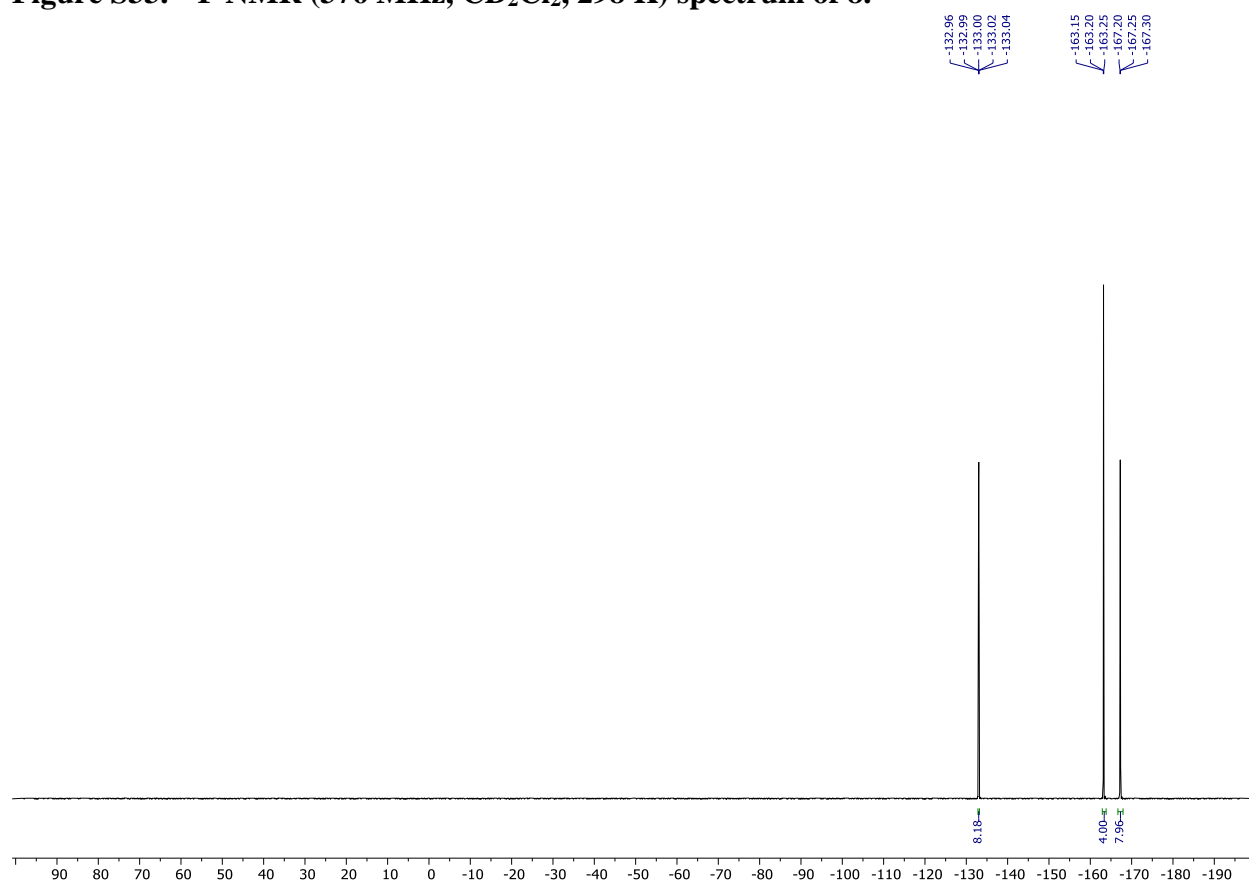

Figure S34.  $^{11}\text{B}$  NMR (128 MHz,  $\text{CD}_2\text{Cl}_2$ , 298 K) spectrum of compound 8.

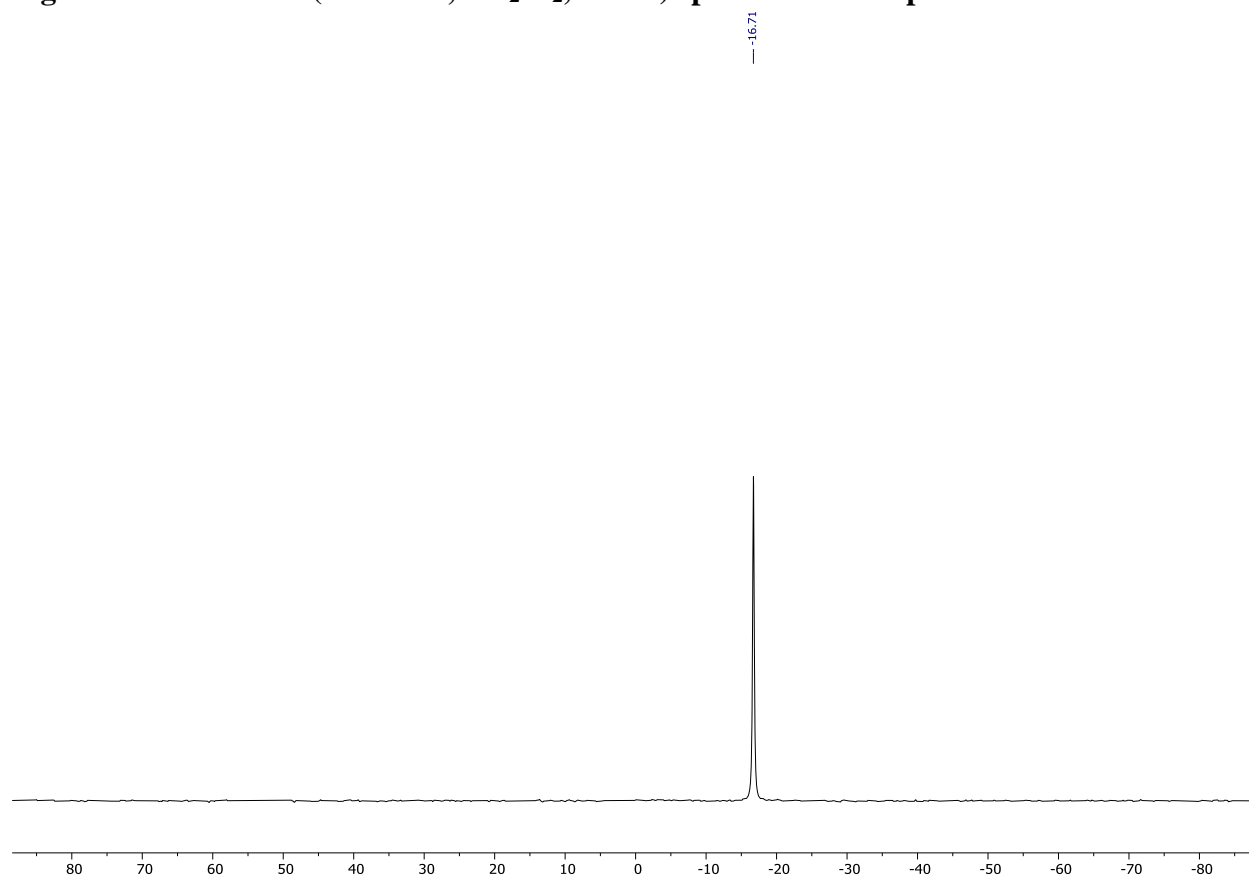

NMR spectra for  $[(\text{CH}_2\text{PPh}_2)_2\text{NCH}_2\text{CHCH}_2][\text{B}(\text{C}_6\text{F}_5)_4]_2$  (**9**)

Figure S35.  $^1\text{H}$  NMR (500 MHz,  $\text{CD}_2\text{Cl}_2$ , 298 K) spectrum of **9**.

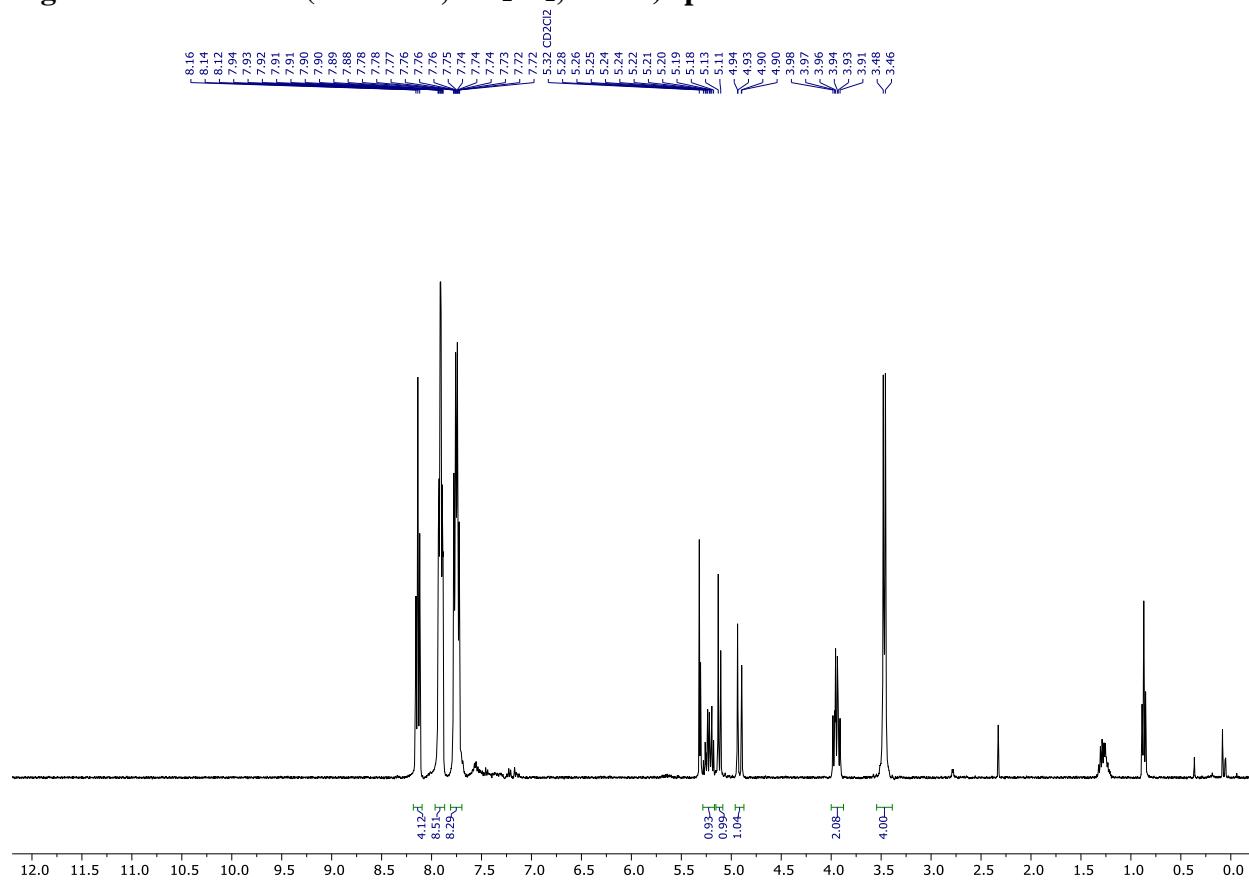

Figure S36.  $^{13}\text{C}\{^1\text{H}\}$  NMR (126 MHz,  $\text{CD}_2\text{Cl}_2$ , 298 K) spectrum of **9**.

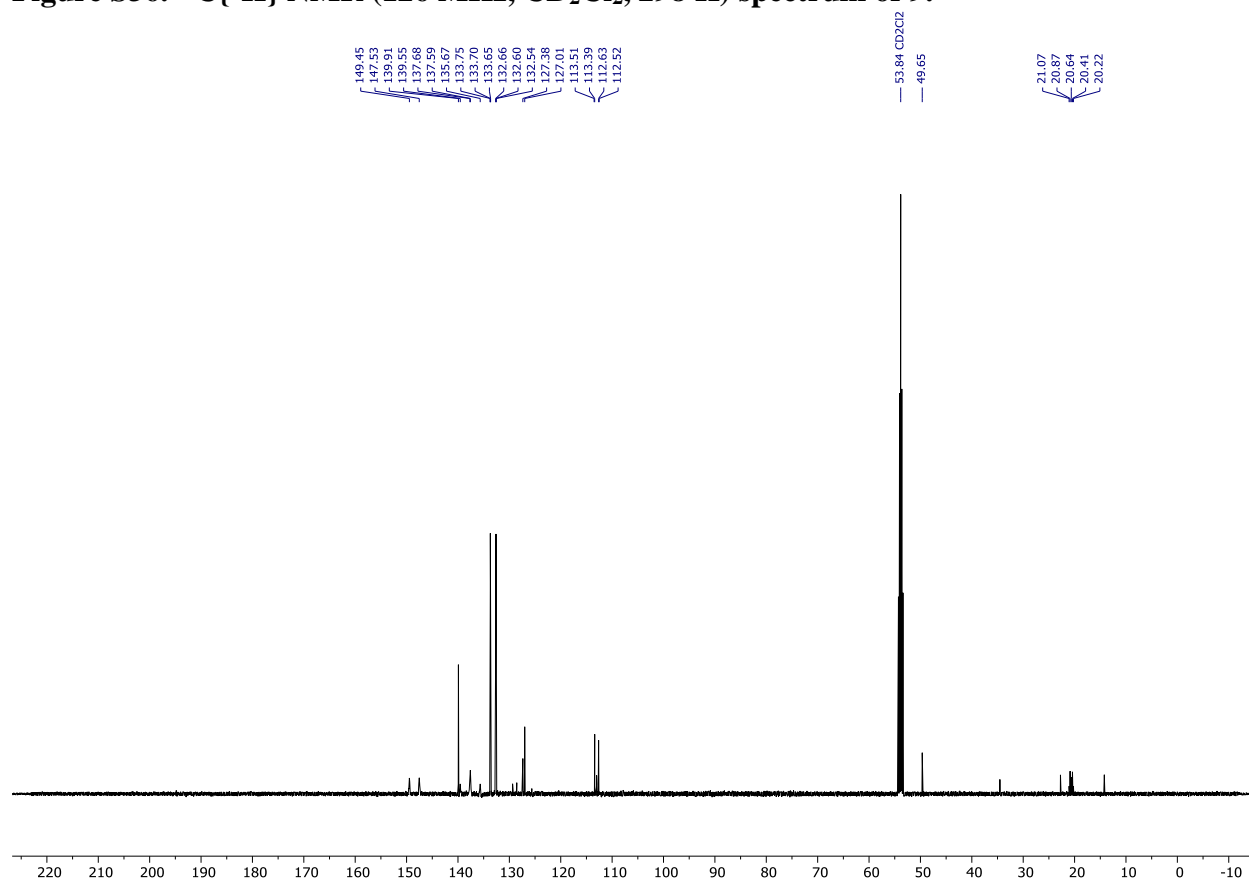

Figure S37.  $^{31}\text{P}\{^1\text{H}\}$  NMR (162 MHz,  $\text{CD}_2\text{Cl}_2$ , 298K) spectrum of **9**.

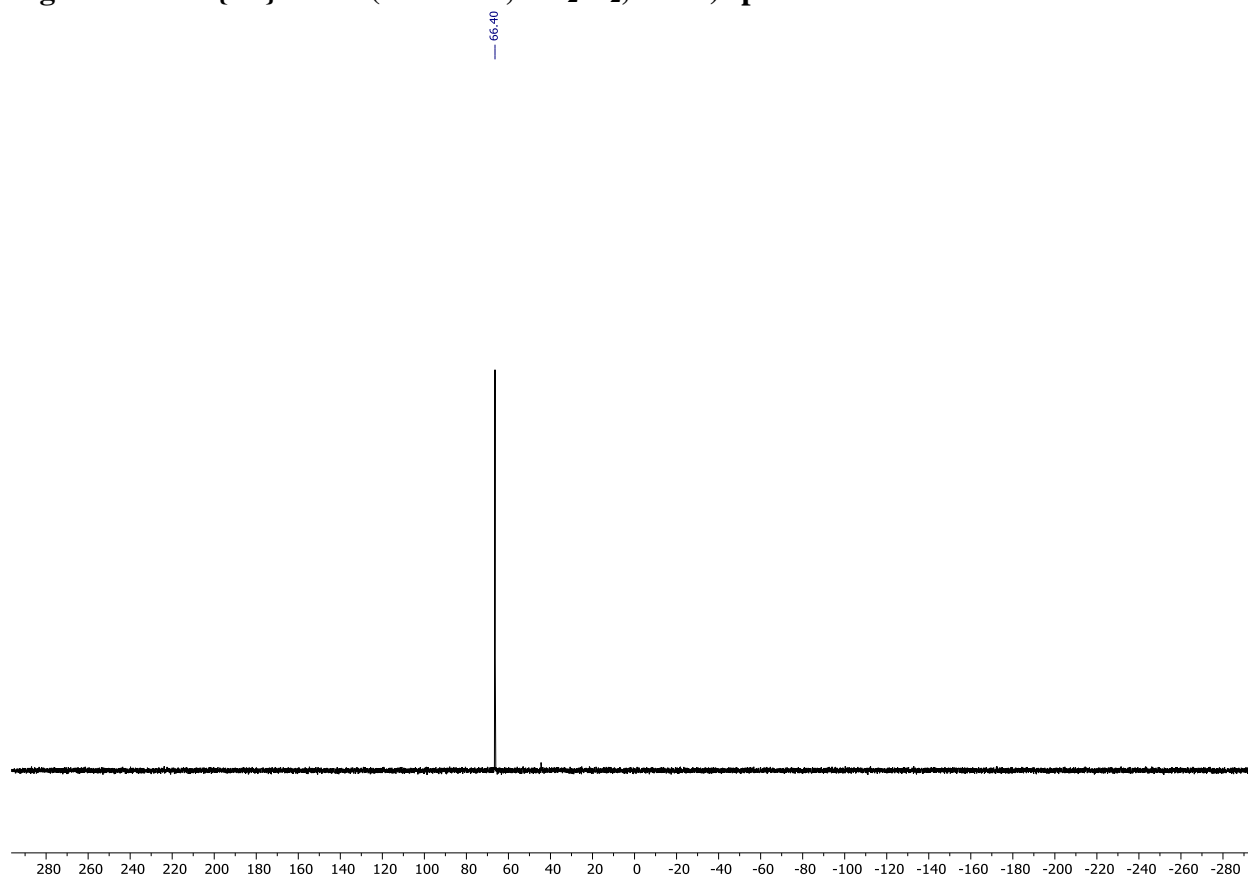

Figure S38.  $^{19}\text{F}$  NMR (376 MHz,  $\text{CD}_2\text{Cl}_2$ , 298 K) spectrum of 9.

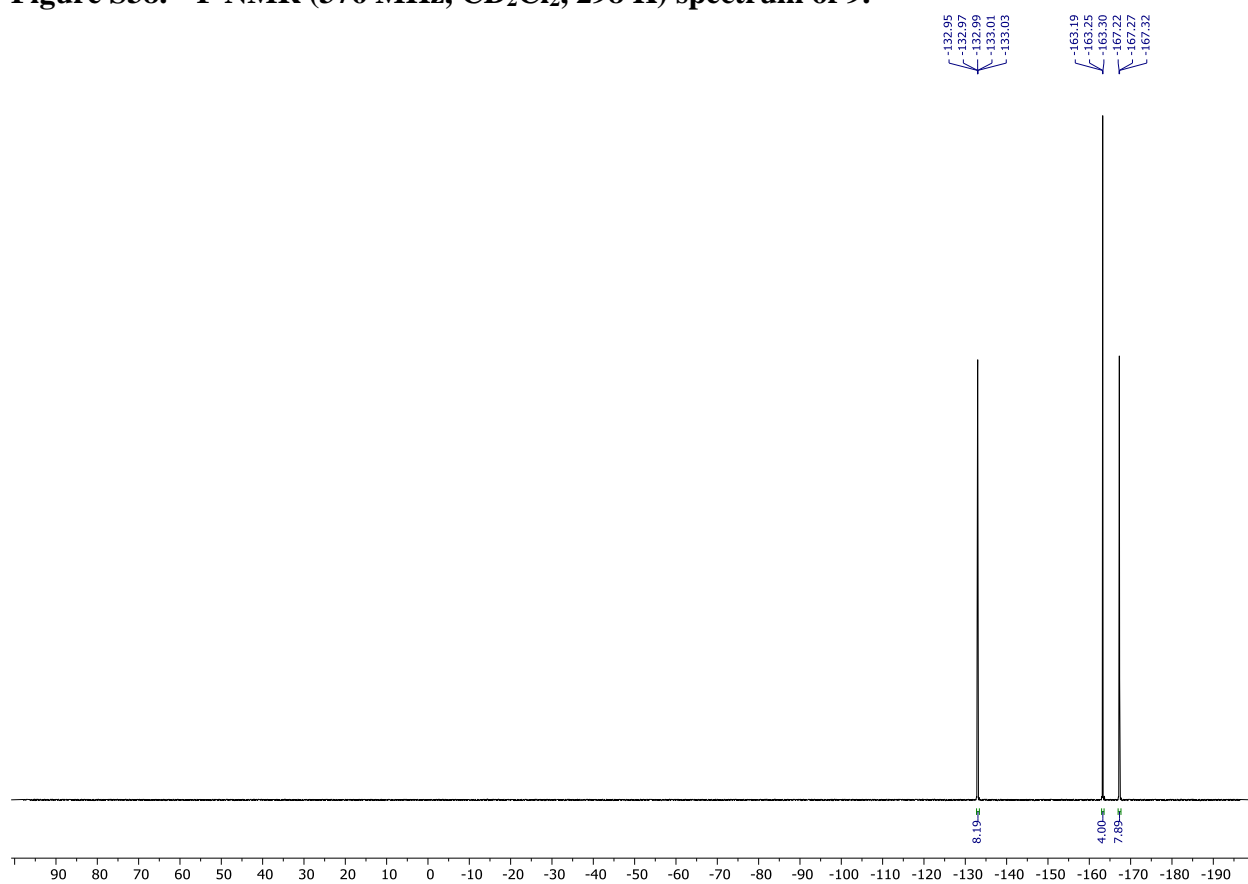



Figure S39.  $^{11}\text{B}$  NMR (128 MHz,  $\text{CD}_2\text{Cl}_2$ , 298 K) spectrum of compound 9.

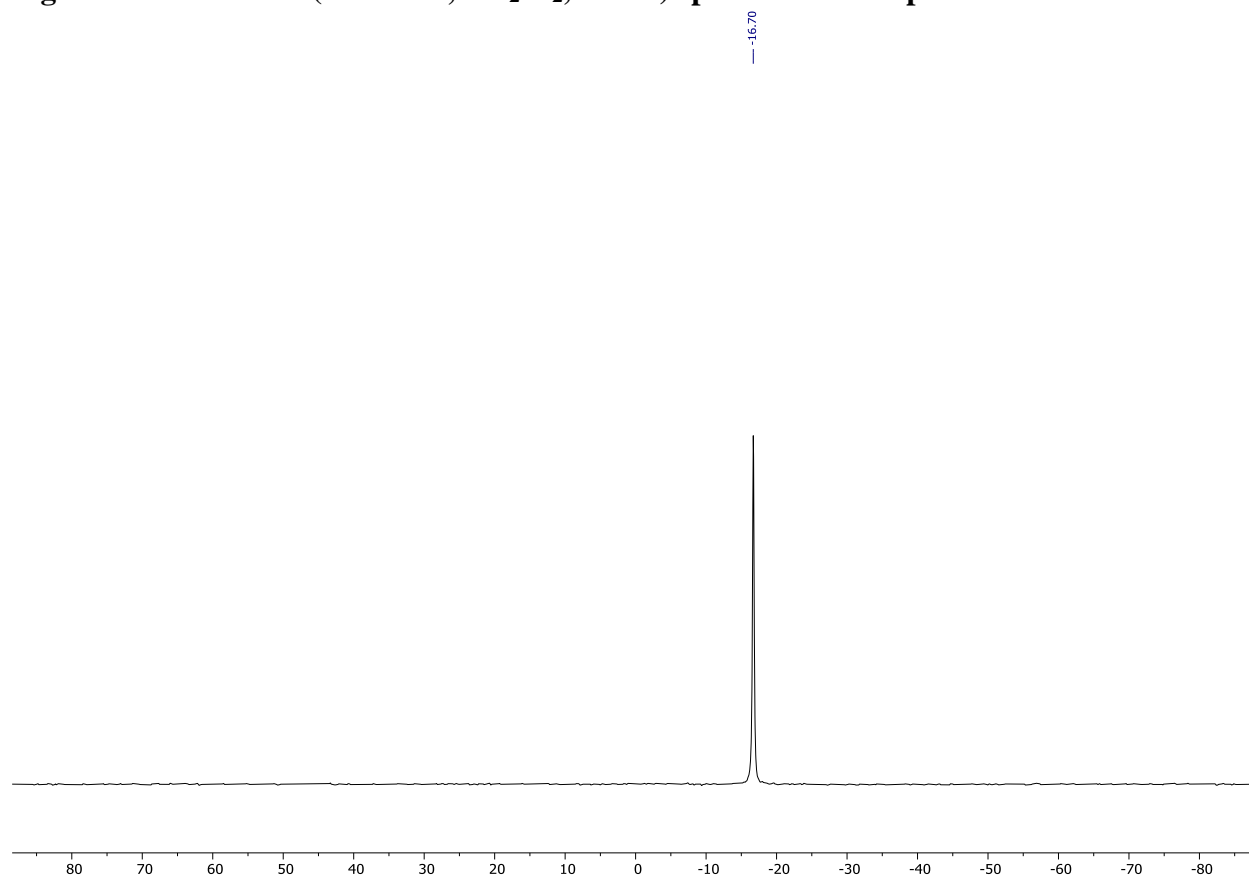

# NMR spectra for $[(\text{CH}_2\text{PPh}_2)_2\text{NCH}_2\text{Ph}][\text{B}(\text{C}_6\text{F}_5)_4]_2$ (**10**)

Figure S40.  $^1\text{H}$  NMR (500 MHz,  $\text{CD}_2\text{Cl}_2$ , 298 K) spectrum of **10**.

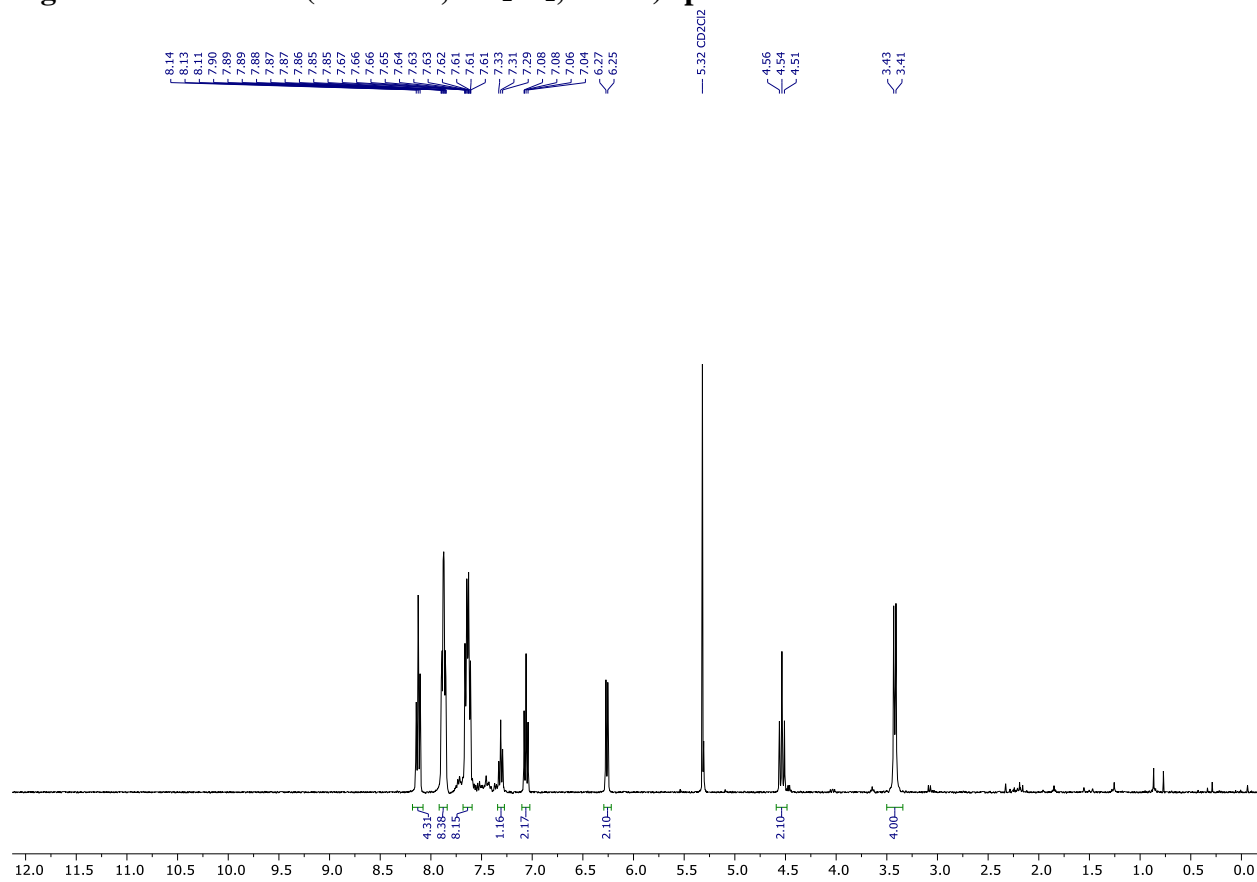

Figure S41.  $^{13}\text{C}\{^1\text{H}\}$  NMR (126 MHz,  $\text{CD}_2\text{Cl}_2$ , 298 K) spectrum of 10.

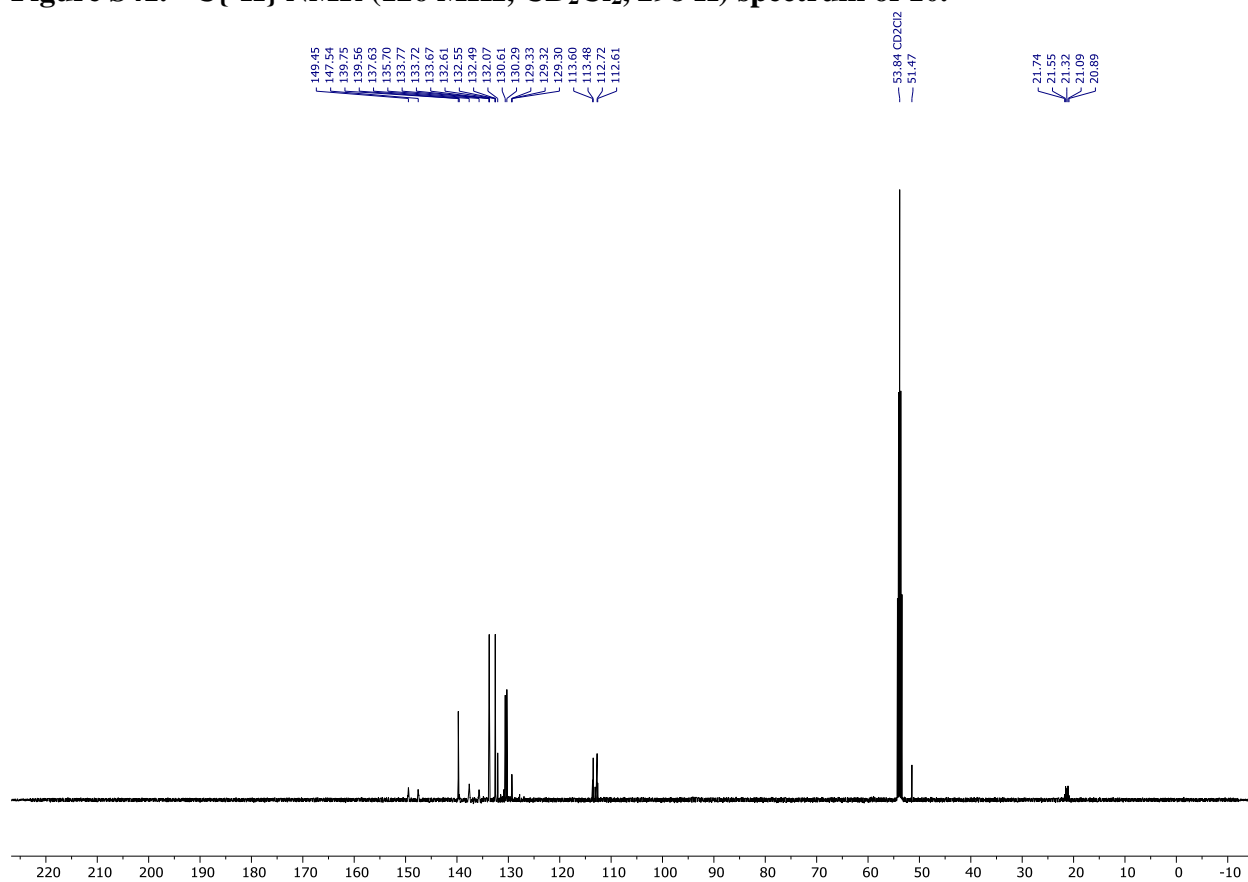

Figure S42.  $^{31}\text{P}\{^1\text{H}\}$  NMR (162 MHz,  $\text{CD}_2\text{Cl}_2$ , 298K) spectrum of 10.

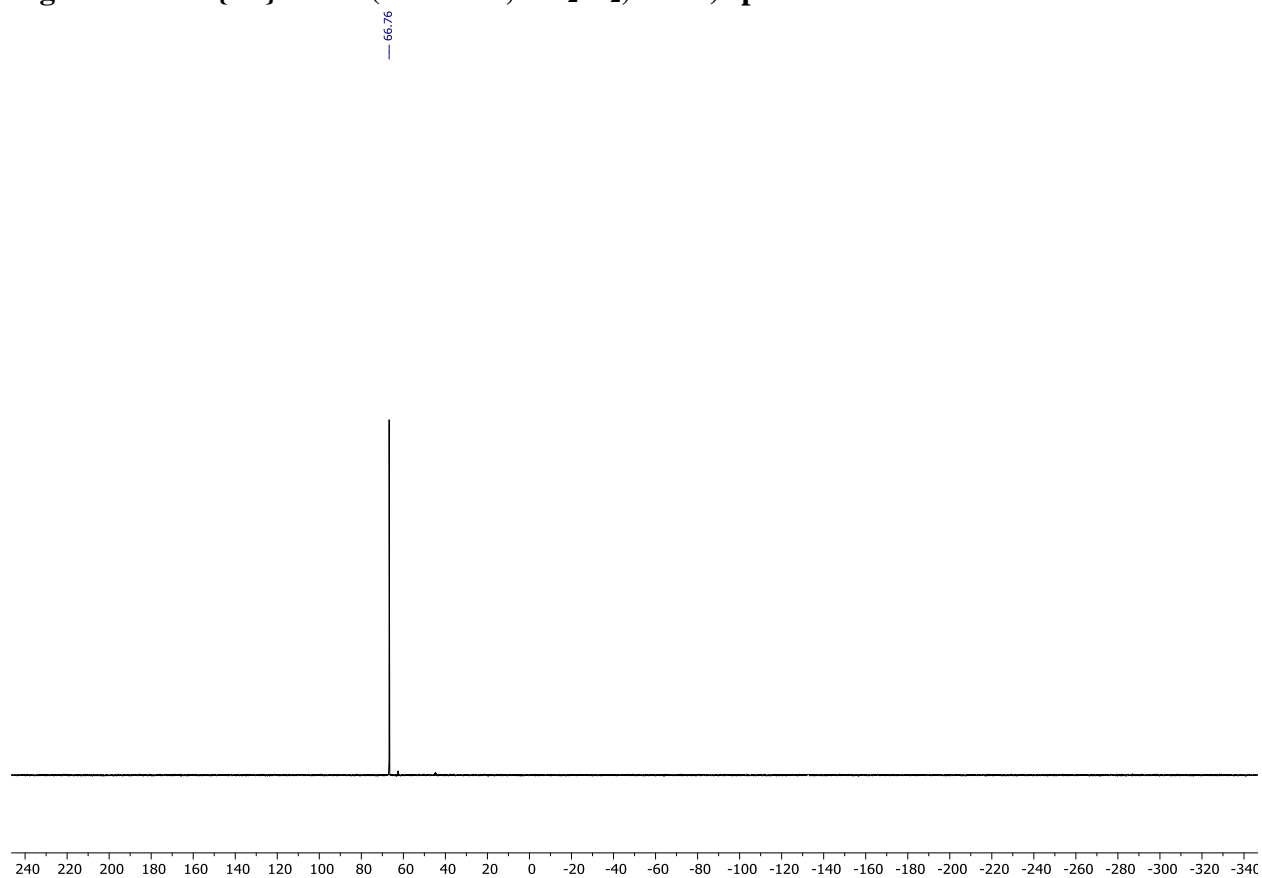

Figure S43.  $^{19}\text{F}$  NMR (376 MHz,  $\text{CD}_2\text{Cl}_2$ , 298 K) spectrum of 10.

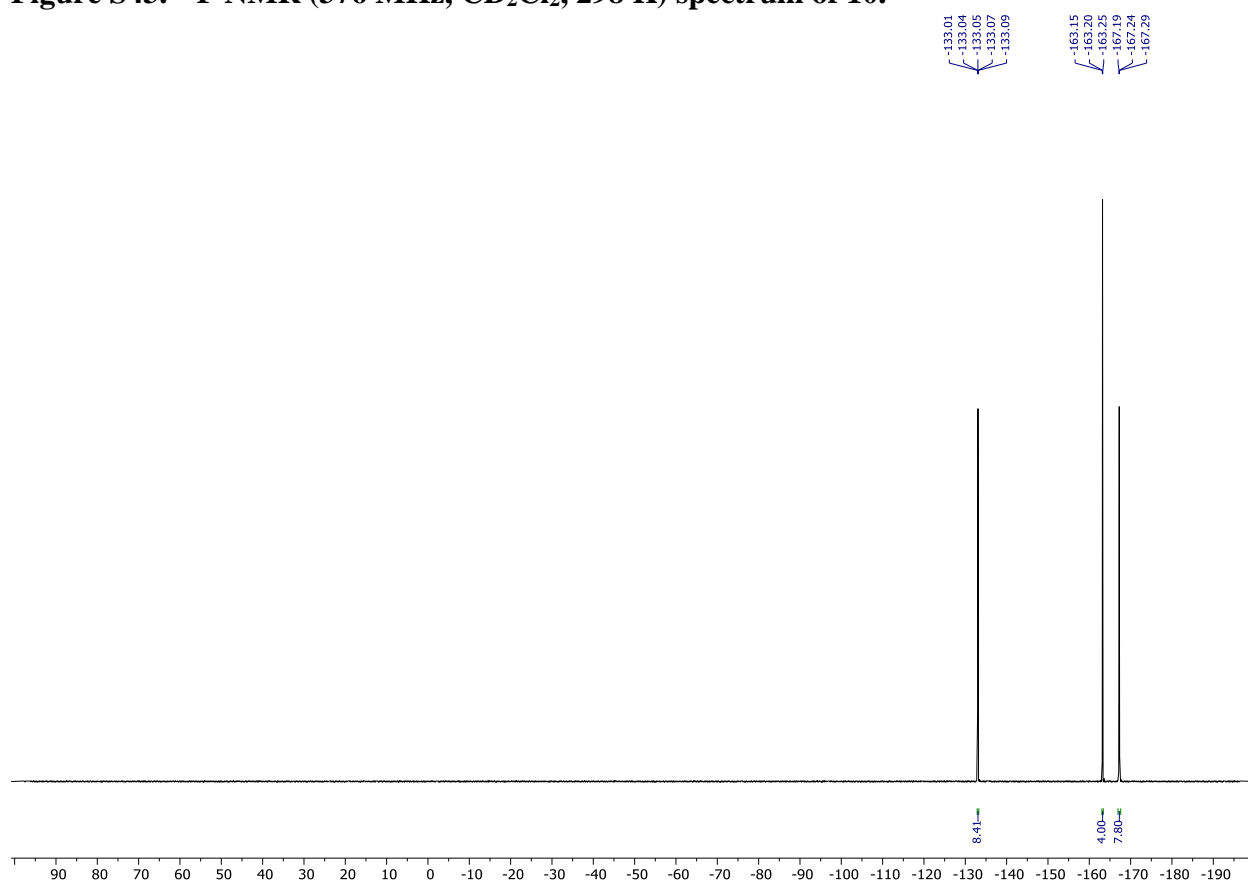

Figure S44.  $^{11}\text{B}$  NMR (128 MHz,  $\text{CD}_2\text{Cl}_2$ , 298 K) spectrum of compound 10.

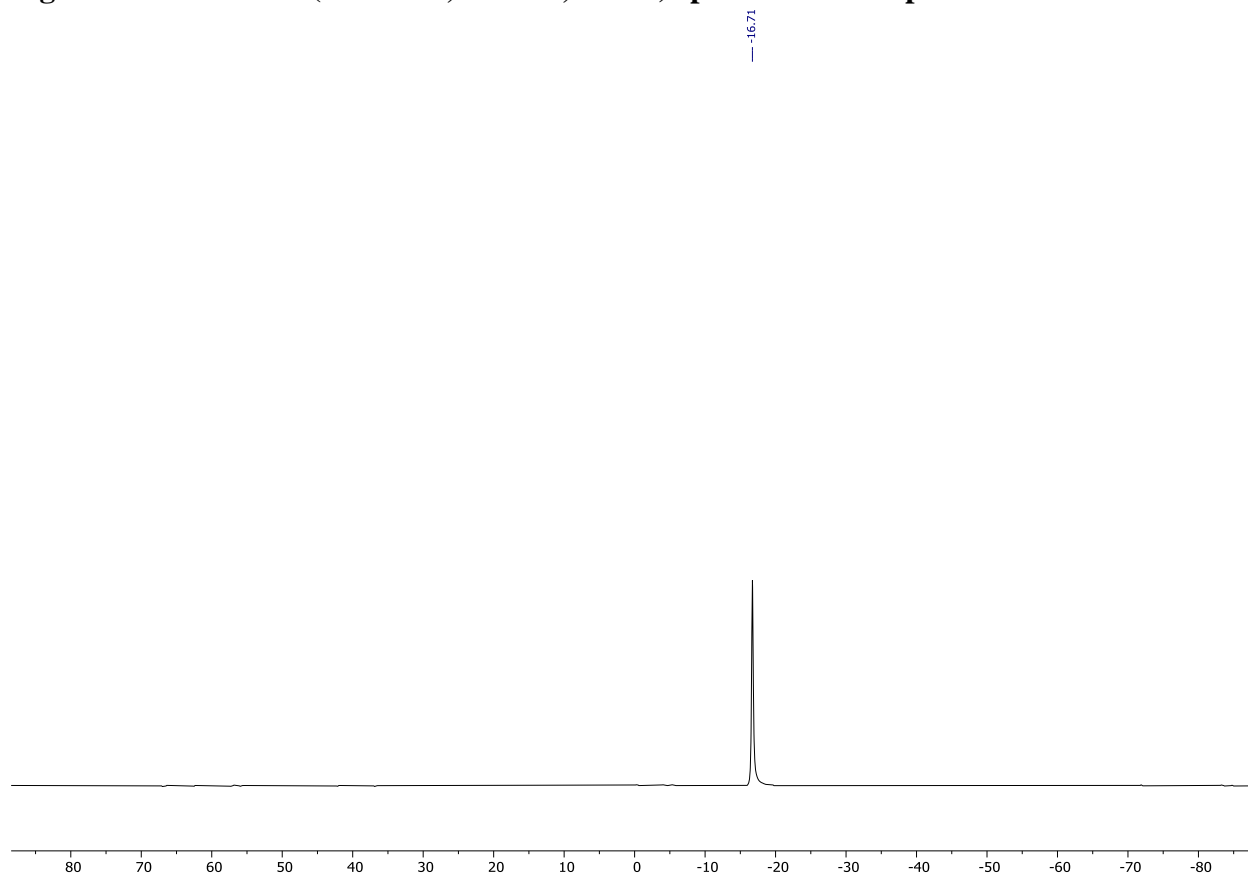

## NMR spectra for the reaction of 8 with [nBu<sub>4</sub>N][Cl]

Figure S45. A) <sup>1</sup>H NMR spectrum in CH<sub>2</sub>Cl<sub>2</sub> of crude reaction mixture (A) and reaction mixture after exposure to high vacuum (B).

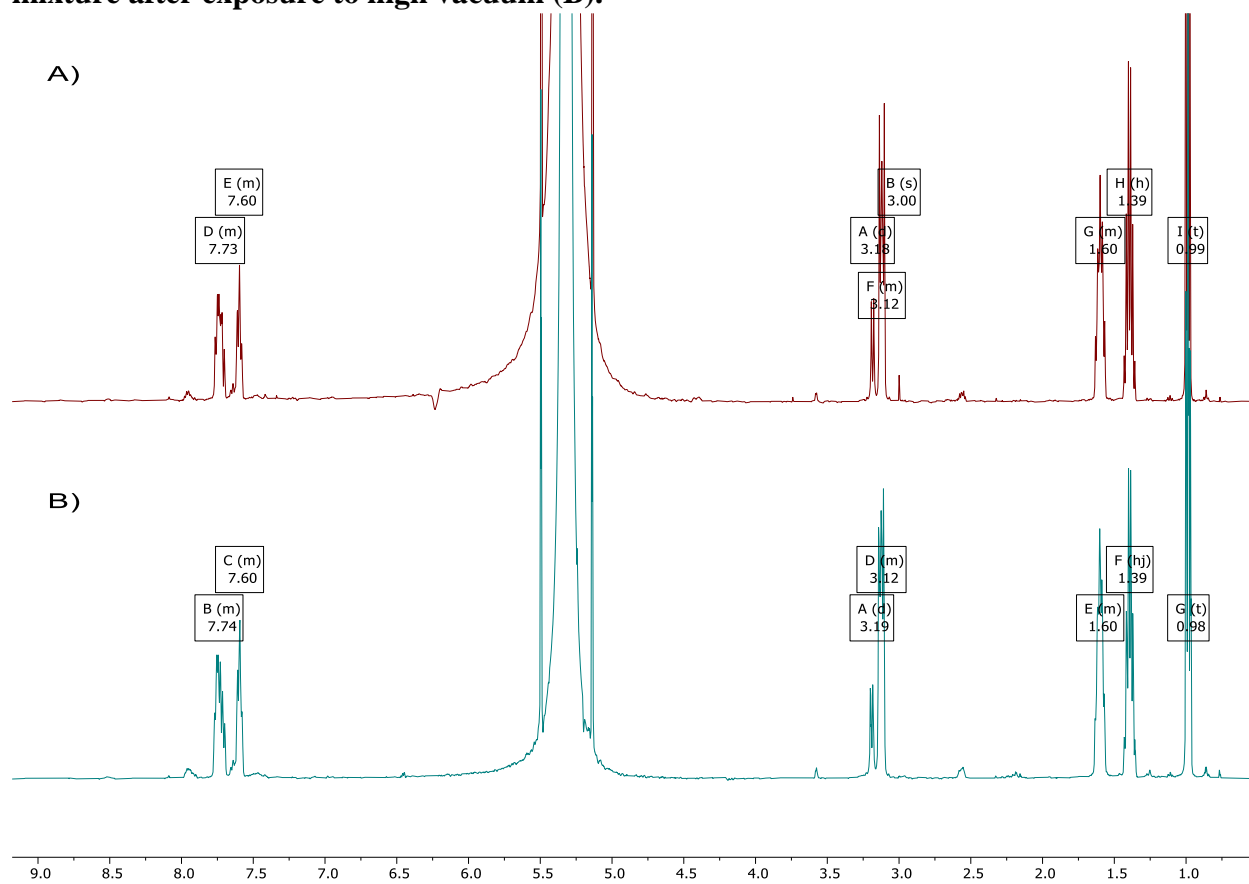

**Figure S46.  $^{31}\text{P}\{^1\text{H}\}$  NMR spectrum in  $\text{CH}_2\text{Cl}_2$  of 8 (A) and reaction mixture indicating formation of 11 (B).**

A)

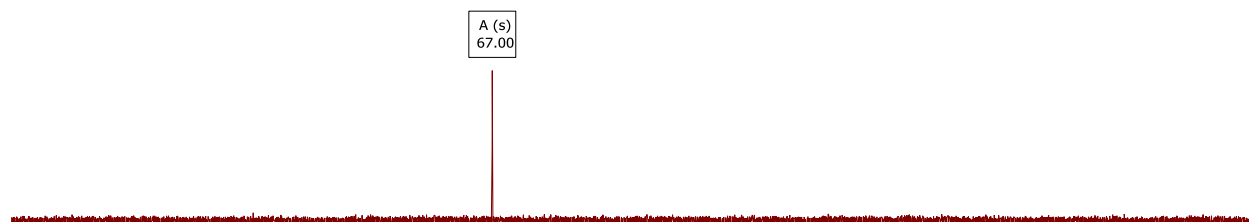

B)

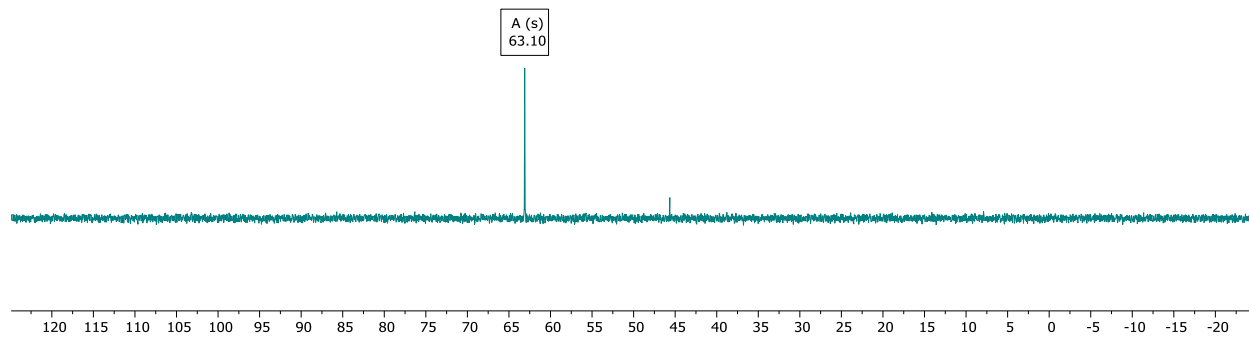



## NMR spectra for the reaction of 9 with [nBu<sub>4</sub>N][Cl]

Figure S47. A) <sup>1</sup>H NMR spectrum in CD<sub>2</sub>Cl<sub>2</sub> of crude reaction mixture (A) and reaction mixture spiked with C<sub>3</sub>H<sub>5</sub>Cl (B).

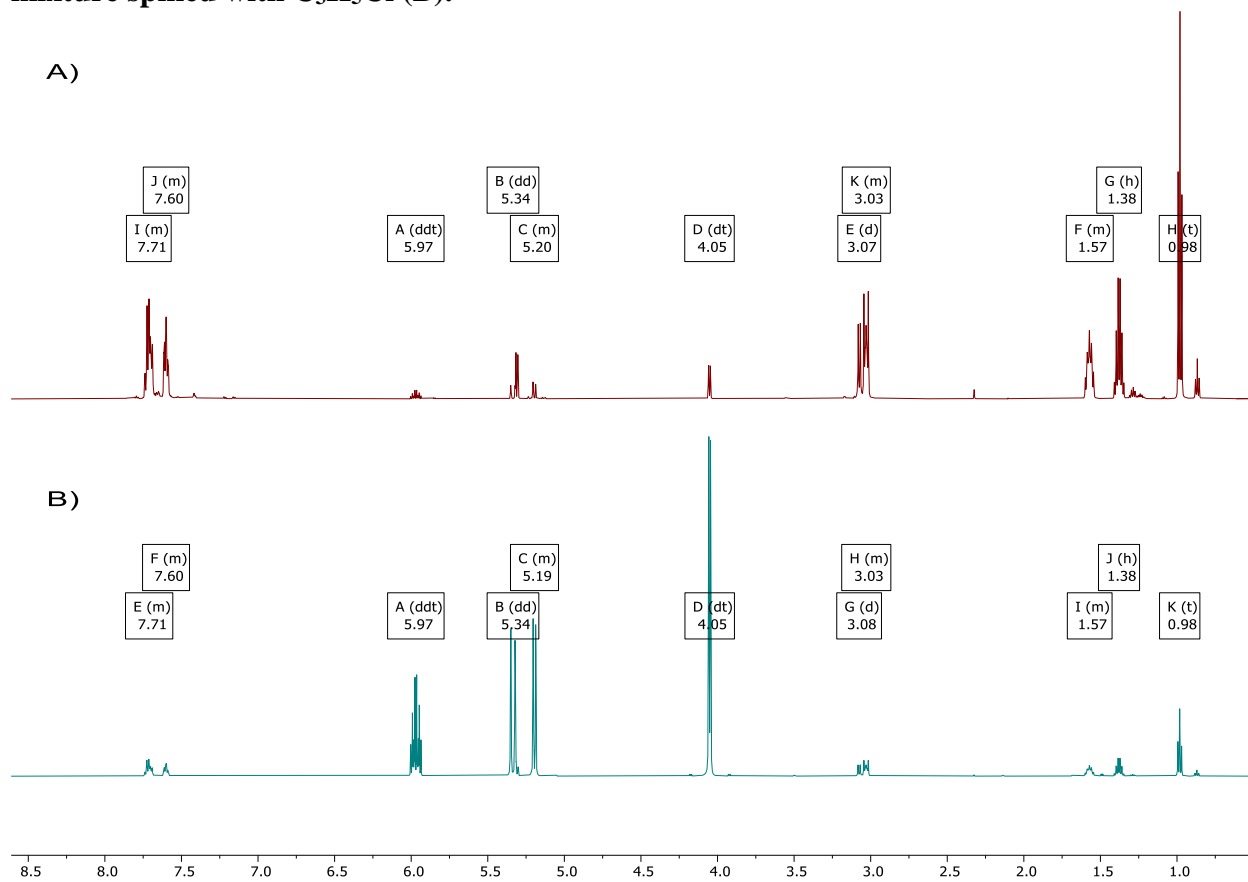

Figure S48.  $^{31}\text{P}\{^1\text{H}\}$  NMR spectrum in  $\text{CH}_2\text{Cl}_2$  of **9** (A) and reaction mixture indicating formation of **11** (B).

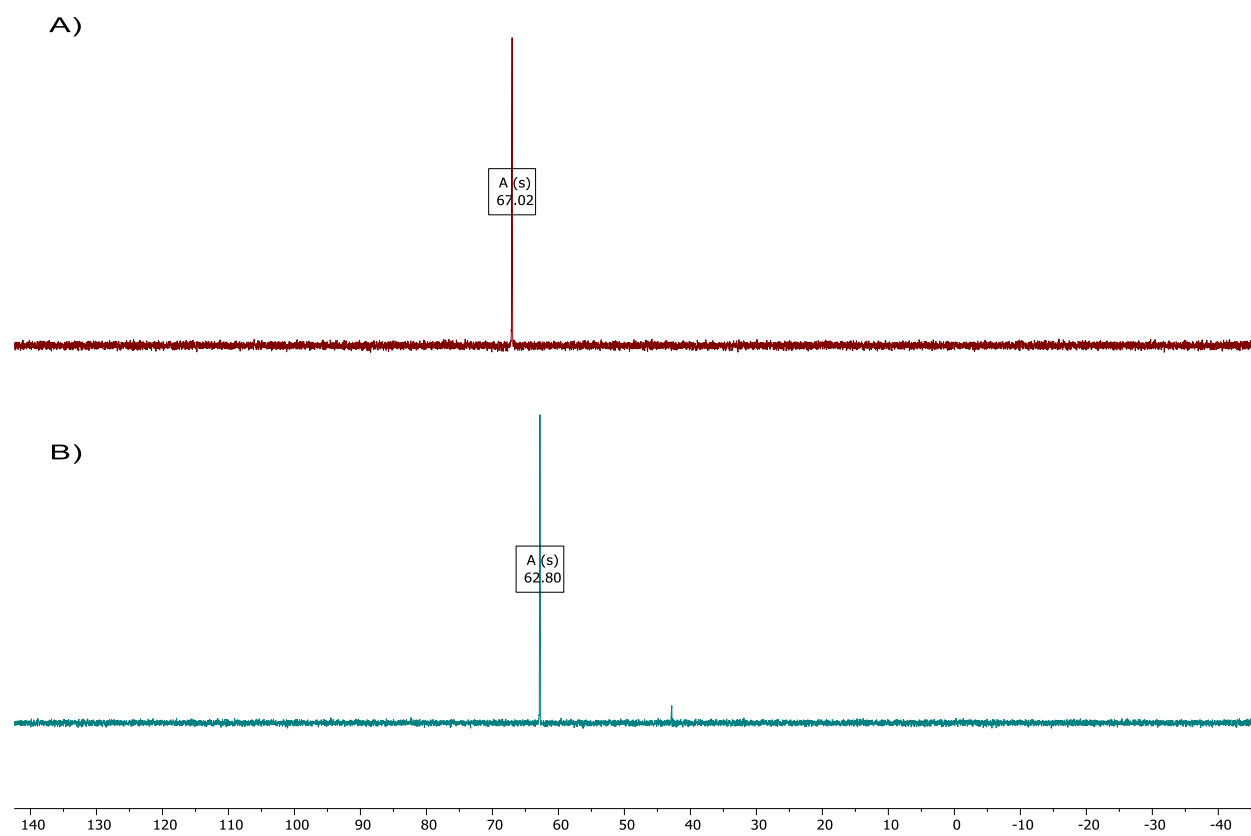

## NMR spectra for the reaction of 10 with [nBu<sub>4</sub>N][Cl]

Figure S49. A) <sup>1</sup>H NMR spectrum in CH<sub>2</sub>Cl<sub>2</sub> of crude reaction mixture (A) and reaction mixture spiked with BnCl (B).

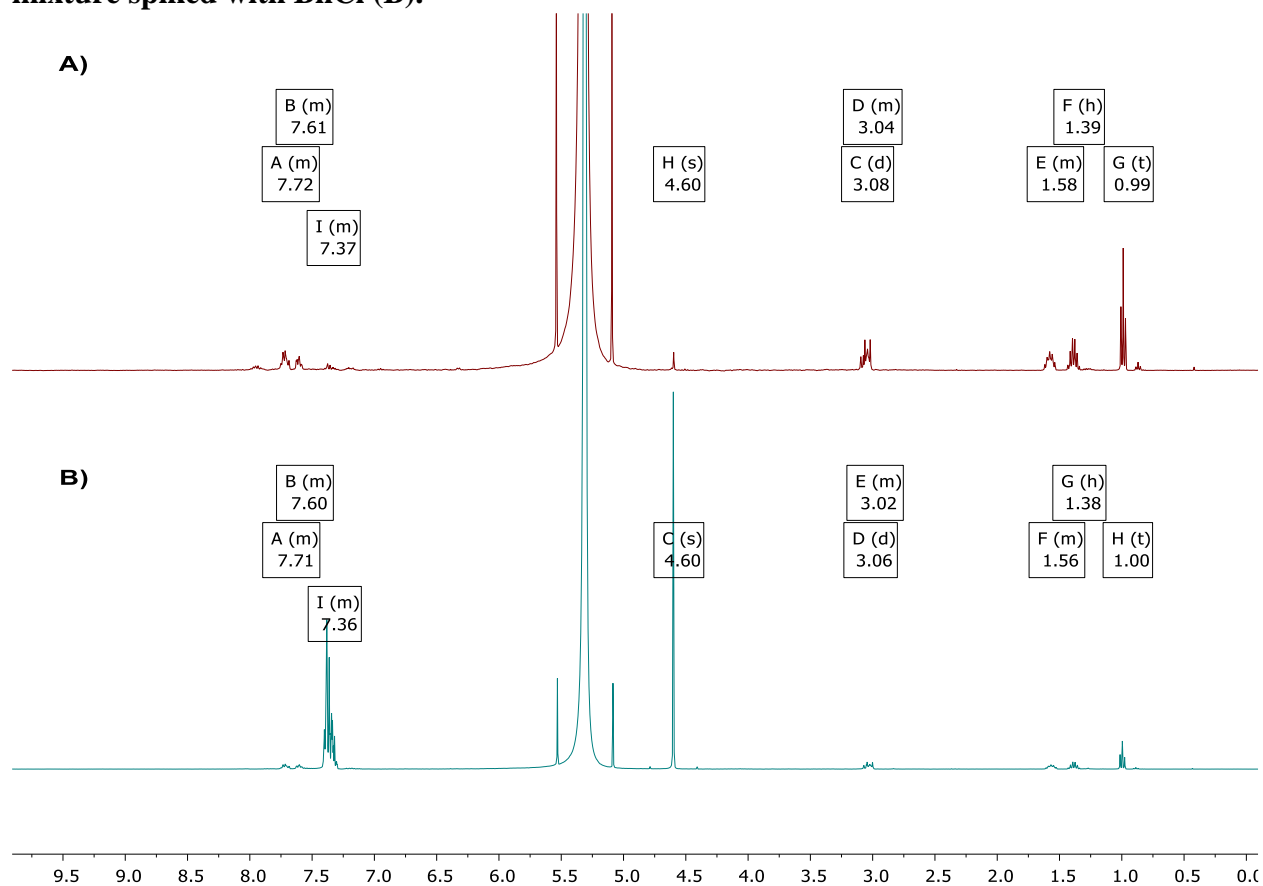

Figure S50.  $^{31}\text{P}\{^1\text{H}\}$  NMR spectrum in  $\text{CH}_2\text{Cl}_2$  of 10 (A) and reaction mixture indicating formation of 11 (B).

A)

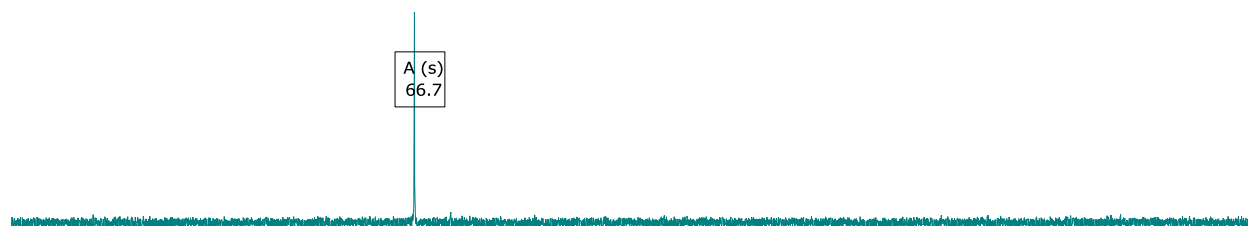

B)

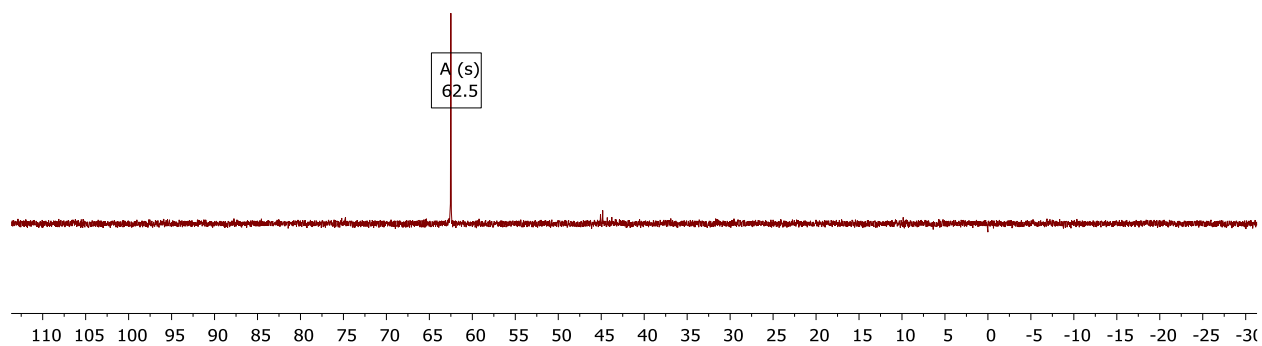

Supplement: d4dt02990a1.pdf [file d4dt02990a1.pdf]
